# Supplementary material for: Bifunctional oligofluorene-cored carbazole dendrimers as solution-processed blue emitters and hole transporters for electroluminescent devices
Source: Royal Society of Chemistry journal article supplement (doi:10.1039/c4tc00637b), 2014-01-01

## Supporting Information

### **Bifunctional Oligofluorenes-Cored Carbazole Dendrimers as Solution Processed Blue Emitters and Hole-Transporters for Electroluminescent Devices**

Preecha Moonsin,<sup>1</sup> Narid Prachumrak,<sup>2</sup> Supawadee Namuangruk,<sup>3</sup> Siriporn Jungsuttiwong,<sup>1</sup> Tinnagon Keawin,<sup>1</sup> Taweesak Sudyoadsuk,<sup>1</sup> and Vinich Promarak<sup>→,2,4</sup>

<sup>1</sup>Department of Chemistry, Faculty of Science, Ubon Ratchathani University, Ubon Ratchathani, 34190 Thailand

<sup>2</sup>School of Chemistry and Center of Excellence for Innovation in Chemistry, Institute of Science, Suranaree University of Technology, Muang District, Nakhon Ratchasima, 30000 Thailand

<sup>3</sup>National Nanotechnology Center (NANOTEC), 130 Thailand Science Park, Klong Luang, Pathumthani, 12120 Thailand

<sup>4</sup>PTT Group Frontier Research Center, PTT Public Company Limited, 555 Vibhavadi Rangsit Road, Chatuchak, Bangkok, 10900 Thailand

→E-mail: [pvinich@sut.ac.th](mailto:pvinich@sut.ac.th)

#### Table of content

|                                                            |            |
|------------------------------------------------------------|------------|
| <b>1. DFT calculation data</b>                             | <b>S2</b>  |
| <b>2. Cyclic voltammetry analysis</b>                      | <b>S16</b> |
| <b>3. OLED devices characteristics</b>                     | <b>S17</b> |
| <b>4. <sup>1</sup>H-NMR and <sup>13</sup>C NMR spectra</b> | <b>S19</b> |

## Methods of calculation

- tert-Bu and methyl groups are modelled by H atom
- All calculations were performed by Gaussian 09 code
- Geometry optimizations were done by B3LYP/6-31G(d,p) method

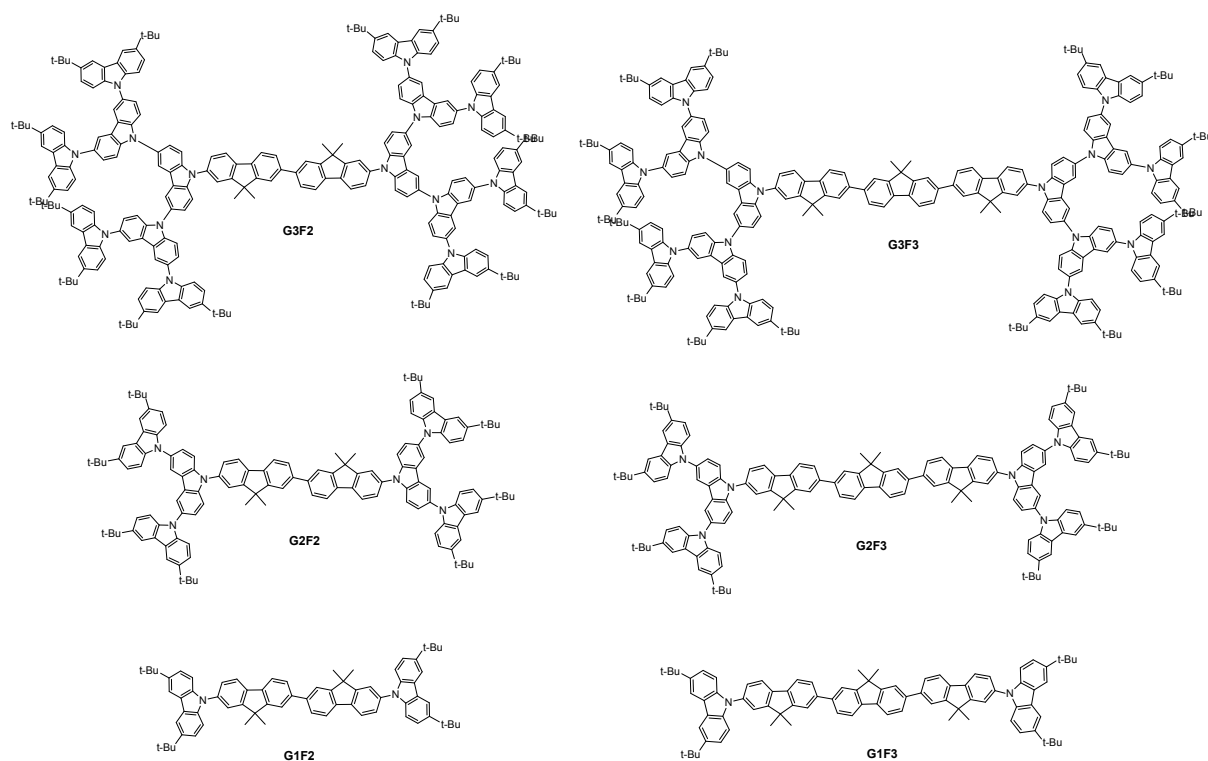

**Scheme SI\_1.** Molecular structures of the compounds.

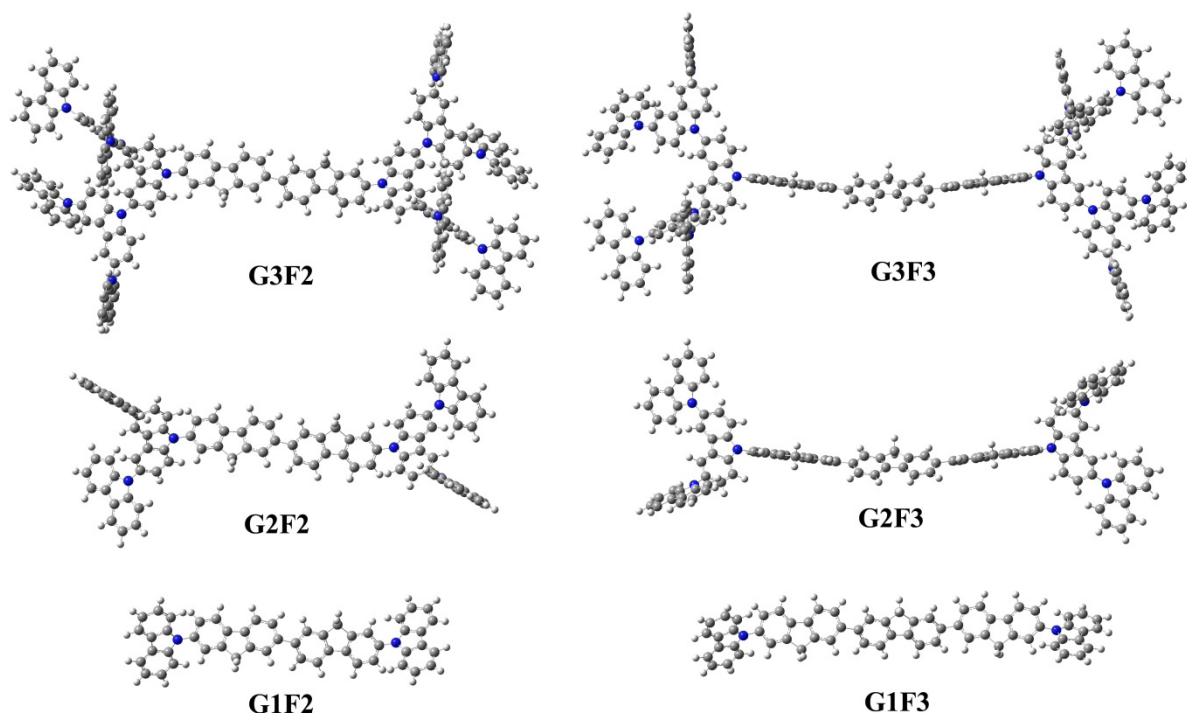

**Figure SI-1** The optimized structure of the compounds calculated by B3LYP/6-31G(d,p).

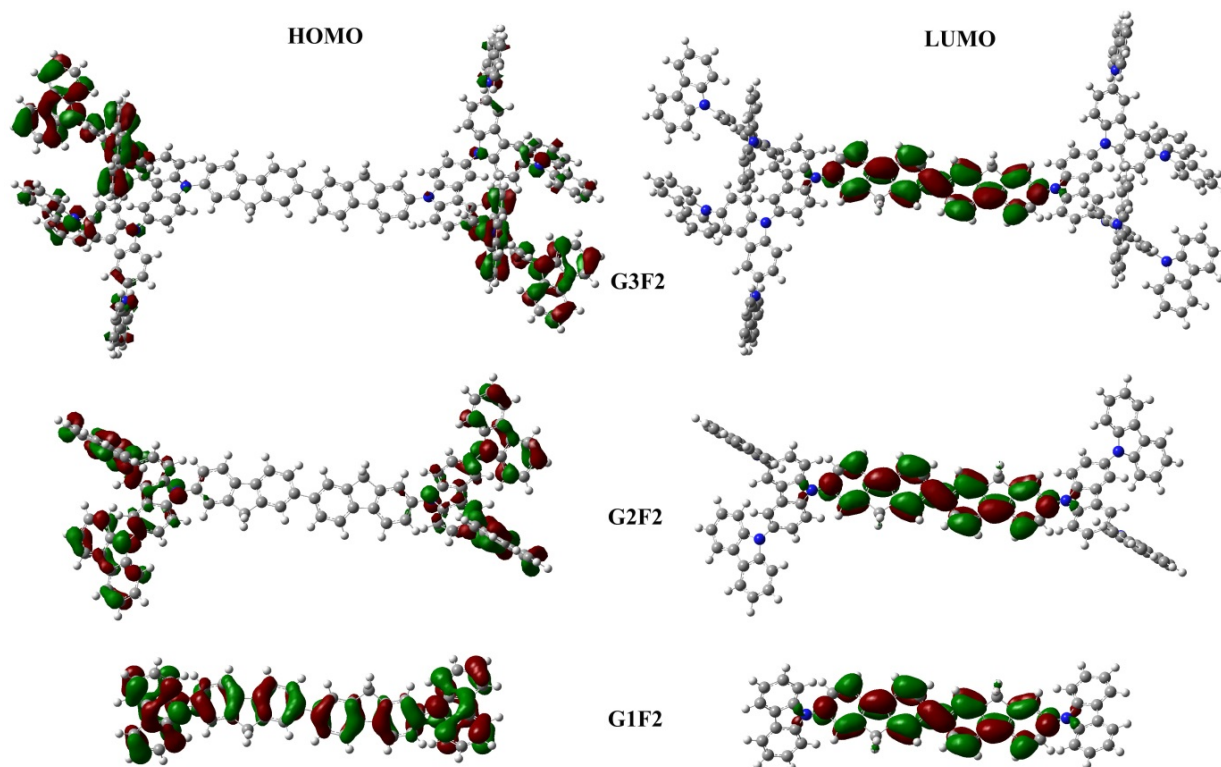

Figure SI\_2 HOMO and LUMO of the compounds calculated by B3LYP/6-31G(d,p).

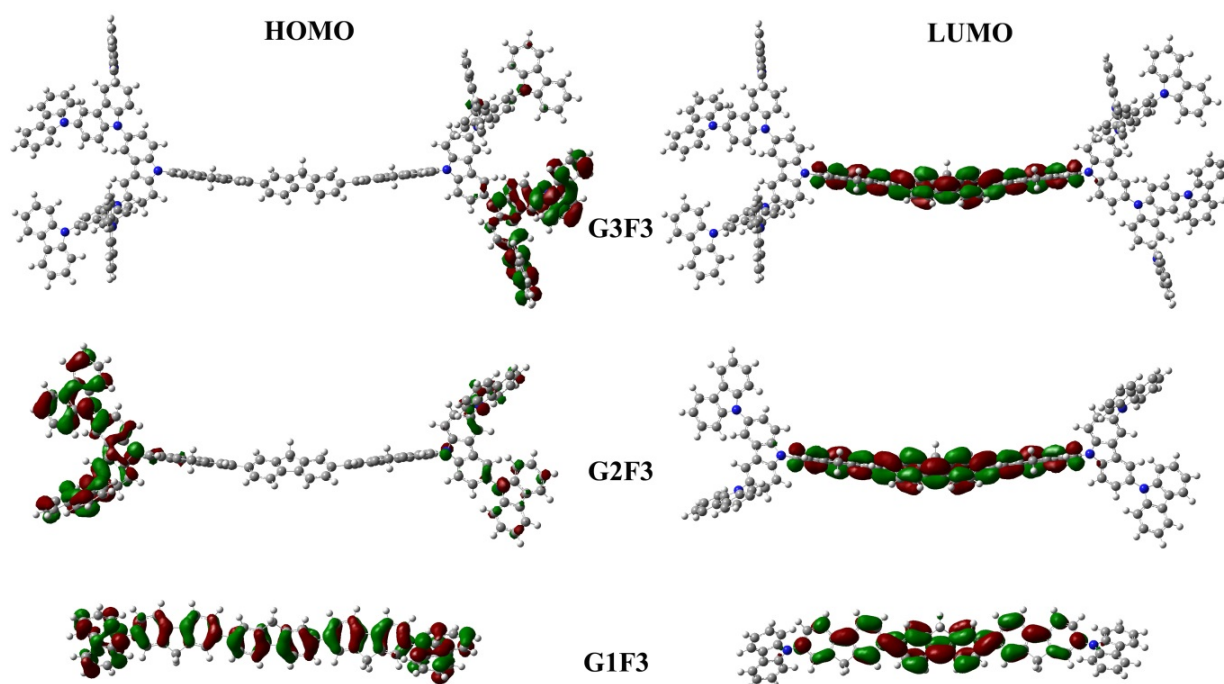

Figure SI\_3 HOMO and LUMO of the compounds calculated by B3LYP/6-31G(d,p).

**Table SI\_1** The calculated HOMO, LUMO and HOMO-LUMO energy gap ( $\Delta_{H-L}$ ) of the studied compounds by TDDFT/B3LYP/6-31G(d,p) in gas ( $\text{CH}_2\text{Cl}_2$  solvent) phase.

| Compound | HOMO          | LUMO          | $\Delta_{H-L}$ |
|----------|---------------|---------------|----------------|
| G1F2     | -5.21 (-5.31) | -1.51 (-1.51) | 3.70 (3.30)    |
| G2F2     | -5.19 (-5.29) | -1.78 (-1.58) | 3.40 (3.21)    |
| G3F2     | -5.20 (-5.26) | -2.04 (-1.61) | 3.17 (3.15)    |
| G1F3     | -5.18 (-5.27) | -1.56 (-1.59) | 3.62 (3.31)    |
| G2F3     | -5.16 (-5.27) | -1.76 (-1.64) | 3.40 (3.23)    |
| G3F3     | -5.18 (-5.26) | -1.95 (-1.68) | 3.23 (3.18)    |

**Coordinate for optimized structure of GnFm (n = 1-3, m = 2-3)**

**Compound G1F2**

|   |           |           |           |           |            |           |           |
|---|-----------|-----------|-----------|-----------|------------|-----------|-----------|
|   | H         | 2.864412  | -2.740653 | -1.232010 |            |           |           |
|   | C         | 4.208065  | 1.367679  | 0.229815  |            |           |           |
| H | -4.276669 | -2.269030 | -0.393568 | H         | 4.276666   | 2.269078  | -0.393304 |
| C | -7.206009 | 1.600166  | -0.521461 | C         | 5.385095   | 0.438569  | 0.010720  |
| C | -7.656169 | 0.350605  | -0.067669 | C         | 6.738377   | 0.676364  | 0.205621  |
| C | -6.738377 | -0.676389 | 0.205560  | C         | 7.656168   | -0.350596 | -0.067738 |
| C | -5.385096 | -0.438570 | 0.010684  | C         | 7.206006   | -1.600101 | -0.521682 |
| C | -4.930104 | 0.820070  | -0.437204 | C         | 5.844817   | -1.842852 | -0.698677 |
| C | -5.844820 | 1.842938  | -0.698433 | C         | 4.930101   | -0.820017 | -0.437320 |
| H | -7.934687 | 2.372614  | -0.743485 | H         | 7.098924   | 1.632190  | 0.573212  |
| H | -7.098924 | -1.632261 | 0.573034  | H         | 7.934683   | -2.372523 | -0.743804 |
| H | -5.510536 | 2.814947  | -1.049214 | H         | 5.510532   | -2.814819 | -1.049576 |
| C | -4.208065 | -1.367707 | 0.229661  | C         | -9.796859  | -0.893429 | -0.486061 |
| H | -4.147246 | -1.713804 | 1.269852  | C         | -9.899574  | 0.874902  | 0.932975  |
| C | -3.023629 | -0.501661 | -0.151062 | C         | -9.394286  | -1.868706 | -1.402652 |
| C | -1.671969 | -0.811863 | -0.145872 | C         | -11.143460 | -0.793015 | -0.051691 |
| C | -0.724963 | 0.157297  | -0.532581 | C         | -9.606207  | 1.966919  | 1.754467  |
| C | -1.184803 | 1.432384  | -0.917905 | C         | -11.208560 | 0.334038  | 0.855023  |
| C | -2.540724 | 1.751127  | -0.921951 | C         | -10.359451 | -2.759259 | -1.867308 |
| C | -3.467696 | 0.780276  | -0.536863 | H         | -8.367591  | -1.927610 | -1.746491 |
| H | -1.334096 | -1.791236 | 0.181122  | C         | -12.092861 | -1.701395 | -0.534263 |
| H | -0.464138 | 2.175645  | -1.244650 | C         | -10.650965 | 2.525069  | 2.487566  |
| H | -2.864418 | 2.740804  | -1.231667 | H         | -8.599673  | 2.364387  | 1.823363  |
| H | 4.147250  | 1.713648  | 1.270049  | C         | -12.239912 | 0.914961  | 1.602132  |
| C | 1.184799  | -1.432272 | -0.918083 | C         | -11.695235 | -2.682668 | -1.437370 |
| C | 0.724960  | -0.157231 | -0.532602 | H         | -10.070790 | -3.526514 | -2.579758 |
| C | 1.671968  | 0.811881  | -0.145778 | H         | -13.127839 | -1.637137 | -0.210566 |
| C | 3.023628  | 0.501680  | -0.151010 | C         | -11.956476 | 2.010083  | 2.412596  |
| C | 3.467693  | -0.780210 | -0.536969 | H         | -10.448421 | 3.375258  | 3.132329  |
| C | 2.540719  | -1.751015 | -0.922172 | H         | -13.247595 | 0.512274  | 1.552184  |
| H | 0.464132  | -2.175493 | -1.244916 | C         | 9.796851   | 0.893503  | -0.485970 |
| H | 1.334096  | 1.791215  | 0.181336  | C         | 9.899583   | -0.875031 | 0.932812  |

|   |            |           |           |
|---|------------|-----------|-----------|
| C | 9.394269   | 1.868911  | -1.402418 |
| C | 11.143457  | 0.793030  | -0.051627 |
| C | 9.606226   | -1.967164 | 1.754153  |
| C | 11.208568  | -0.334153 | 0.854924  |
| C | 10.359428  | 2.759532  | -1.866956 |
| H | 8.367571   | 1.927863  | -1.746240 |
| C | 12.092852  | 1.701480  | -0.534078 |
| C | 10.650993  | -2.525416 | 2.487162  |
| H | 8.599694   | -2.364643 | 1.823004  |
| C | 12.239928  | -0.915180 | 1.601940  |
| C | 11.695217  | 2.682882  | -1.437041 |
| H | 10.070760  | 3.526888  | -2.579293 |
| H | 13.127833  | 1.637177  | -0.210400 |
| C | 11.956503  | -2.010418 | 2.412251  |
| H | 10.448457  | -3.375696 | 3.131808  |
| H | 13.247610  | -0.512484 | 1.552039  |
| N | -9.047023  | 0.123498  | 0.115873  |
| N | 9.047023   | -0.123512 | 0.115825  |
| H | 12.422293  | 3.393769  | -1.817253 |
| H | 12.748344  | -2.470397 | 2.995327  |
| H | -12.422316 | -3.393500 | -1.817678 |
| H | -12.748311 | 2.469981  | 2.995745  |

### Compound G2F2

|   |           |           |           |
|---|-----------|-----------|-----------|
| H | -4.336341 | -2.149350 | -0.698022 |
| C | -7.156475 | 1.801863  | -0.833266 |
| C | -7.641897 | 0.562918  | -0.389254 |
| C | -6.757250 | -0.491119 | -0.112780 |
| C | -5.396275 | -0.289966 | -0.296268 |
| C | -4.904442 | 0.957612  | -0.736916 |
| C | -5.787746 | 2.007271  | -0.999976 |
| H | -7.862173 | 2.595296  | -1.056172 |
| H | -7.147560 | -1.438194 | 0.247378  |
| H | -5.423809 | 2.970878  | -1.343866 |
| C | -4.246505 | -1.251345 | -0.072843 |
| H | -4.201327 | -1.600400 | 0.967123  |
| C | -3.037054 | -0.417085 | -0.445633 |
| C | -1.694562 | -0.765198 | -0.437109 |
| C | -0.720242 | 0.177885  | -0.819988 |
| C | -1.142842 | 1.466325  | -1.203926 |
| C | -2.488967 | 1.823312  | -1.210301 |
| C | -3.443310 | 0.877563  | -0.829766 |
| H | -1.385531 | -1.754460 | -0.111635 |
| H | -0.401130 | 2.189413  | -1.528471 |
| H | -2.783794 | 2.822161  | -1.519168 |
| H | 4.201372  | 1.600414  | 0.967228  |
| C | 1.142842  | -1.466052 | -1.204119 |
| C | 0.720253  | -0.177656 | -0.820023 |
| C | 1.694584  | 0.765382  | -0.437059 |
| C | 3.037074  | 0.417265  | -0.445651 |

|   |            |           |           |
|---|------------|-----------|-----------|
| C | 3.443319   | -0.877341 | -0.829941 |
| C | 2.488966   | -1.823043 | -1.210566 |
| H | 0.401123   | -2.189103 | -1.528731 |
| H | 1.385563   | 1.754609  | -0.111470 |
| H | 2.783782   | -2.821855 | -1.519560 |
| C | 4.246536   | 1.251474  | -0.072778 |
| H | 4.336369   | 2.149547  | -0.697859 |
| C | 5.396298   | 0.290112  | -0.296320 |
| C | 6.757272   | 0.491222  | -0.112794 |
| C | 7.641907   | -0.562800 | -0.389381 |
| C | 7.156472   | -1.801682 | -0.833544 |
| C | 5.787739   | -2.007051 | -1.000288 |
| C | 4.904451   | -0.957411 | -0.737112 |
| H | 7.147598   | 1.438250  | 0.247470  |
| H | 7.862157   | -2.595101 | -1.056540 |
| H | 5.423791   | -2.970611 | -1.344300 |
| C | -9.824270  | -0.581396 | -0.874578 |
| C | -9.874392  | 1.121133  | 0.617866  |
| C | -9.450095  | -1.535438 | -1.824952 |
| C | -11.172713 | -0.444619 | -0.455904 |
| C | -9.550478  | 2.163396  | 1.490864  |
| C | -11.204422 | 0.642550  | 0.499365  |
| C | -10.442158 | -2.357389 | -2.348296 |
| H | -8.423017  | -1.623585 | -2.160596 |
| C | -12.151981 | -1.295628 | -0.977299 |
| C | -10.579747 | 2.739569  | 2.227236  |
| H | -8.531802  | 2.521873  | 1.586830  |
| C | -12.221753 | 1.220214  | 1.264969  |
| C | -11.783318 | -2.249209 | -1.926405 |
| H | -10.191775 | -3.094500 | -3.103869 |
| H | -13.186324 | -1.226162 | -0.656508 |
| C | -11.907217 | 2.275259  | 2.121804  |
| H | -10.368691 | 3.566443  | 2.896980  |
| H | -13.242701 | 0.856735  | 1.209482  |
| C | 9.824306   | 0.581554  | -0.874512 |
| C | 9.874376   | -1.121185 | 0.617695  |
| C | 9.450159   | 1.535742  | -1.824750 |
| C | 11.172739  | 0.444696  | -0.455838 |
| C | 9.550431   | -2.163560 | 1.490548  |
| C | 11.204416  | -0.642602 | 0.499285  |
| C | 10.442240  | 2.357753  | -2.347962 |
| H | 8.423086   | 1.623951  | -2.160393 |
| C | 12.152031  | 1.295760  | -0.977101 |
| C | 10.579678  | -2.739844 | 2.226864  |
| H | 8.531748   | -2.522035 | 1.586442  |
| C | 12.221722  | -1.220377 | 1.264838  |
| C | 11.783395  | 2.249483  | -1.926075 |
| H | 10.191881  | 3.094972  | -3.103438 |
| H | 13.186366  | 1.226233  | -0.656301 |
| C | 11.907154  | -2.275532 | 2.121526  |
| H | 10.368599  | -3.566805 | 2.896493  |

|   |            |           |           |
|---|------------|-----------|-----------|
| H | 13.242676  | -0.856901 | 1.209426  |
| N | -9.042930  | 0.373129  | -0.219128 |
| N | 9.042941   | -0.373056 | -0.219212 |
| C | -12.972179 | 2.952831  | 4.293232  |
| C | -14.057832 | 3.545240  | 2.392104  |
| C | -12.080800 | 2.423108  | 5.230283  |
| C | -14.140946 | 3.652787  | 4.689695  |
| C | -14.435323 | 3.762578  | 1.064251  |
| C | -14.834015 | 4.031057  | 3.475852  |
| C | -12.368888 | 2.617309  | 6.579242  |
| H | -11.197726 | 1.876223  | 4.918229  |
| C | -14.405645 | 3.833342  | 6.052352  |
| C | -15.615526 | 4.465521  | 0.833413  |
| H | -13.829067 | 3.399025  | 0.241733  |
| C | -16.016517 | 4.733328  | 3.214810  |
| C | -13.516639 | 3.316858  | 6.990335  |
| H | -11.691781 | 2.215812  | 7.327574  |
| H | -15.295947 | 4.367089  | 6.372700  |
| C | -16.402582 | 4.945050  | 1.894656  |
| H | -15.931362 | 4.646584  | -0.189862 |
| H | -16.622792 | 5.110966  | 4.033338  |
| C | -13.880505 | -2.719266 | -3.227983 |
| C | -12.774015 | -4.510607 | -2.385864 |
| C | -14.280996 | -1.434944 | -3.605947 |
| C | -14.613441 | -3.871569 | -3.612749 |
| C | -11.881301 | -5.357067 | -1.722866 |
| C | -13.906913 | -5.015554 | -3.074991 |
| C | -15.440642 | -1.316899 | -4.368438 |
| H | -13.707409 | -0.560642 | -3.318047 |
| C | -15.775921 | -3.723475 | -4.378526 |
| C | -12.131080 | -6.726636 | -1.770500 |
| H | -11.025979 | -4.960926 | -1.186299 |
| C | -14.133262 | -6.396571 | -3.107100 |
| C | -16.184977 | -2.446405 | -4.750605 |
| H | -15.773920 | -0.329458 | -4.674237 |
| H | -16.349132 | -4.595541 | -4.680310 |
| C | -13.242602 | -7.245559 | -2.456731 |
| H | -11.452176 | -7.405893 | -1.263122 |
| H | -14.995824 | -6.799319 | -3.630509 |
| C | 12.774073  | 4.510930  | -2.385348 |
| C | 13.880670  | 2.719654  | -3.227470 |
| C | 11.881303  | 5.357339  | -1.722359 |
| C | 13.907006  | 5.015937  | -3.074377 |
| C | 14.281232  | 1.435362  | -3.605463 |
| C | 14.613595  | 3.871996  | -3.612141 |
| C | 12.131046  | 6.726916  | -1.769919 |
| H | 11.025969  | 4.961148  | -1.185847 |
| C | 14.133313  | 6.396962  | -3.106419 |
| C | 15.440944  | 1.317388  | -4.367867 |
| H | 13.707647  | 0.561028  | -3.317661 |
| C | 15.776149  | 3.723973  | -4.377821 |

|   |            |           |           |
|---|------------|-----------|-----------|
| C | 13.242590  | 7.245899  | -2.456069 |
| H | 11.452098  | 7.406134  | -1.262547 |
| H | 14.995894  | 6.799760  | -3.629757 |
| C | 16.185278  | 2.446932  | -4.749919 |
| H | 15.774276  | 0.329971  | -4.673684 |
| H | 16.349357  | 4.596070  | -4.679517 |
| C | 14.057736  | -3.545597 | 2.391683  |
| C | 12.972045  | -2.953468 | 4.292878  |
| C | 14.435257  | -3.762727 | 1.063805  |
| C | 14.833867  | -4.031625 | 3.475373  |
| C | 12.080651  | -2.423883 | 5.229993  |
| C | 14.140774  | -3.653536 | 4.689257  |
| C | 15.615439  | -4.465676 | 0.832884  |
| H | 13.829034  | -3.399018 | 0.241332  |
| C | 16.016351  | -4.733897 | 3.214247  |
| C | 12.368687  | -2.618333 | 6.578928  |
| H | 11.197602  | -1.876918 | 4.918007  |
| C | 14.405422  | -3.834340 | 6.051892  |
| C | 16.402447  | -4.945411 | 1.894071  |
| H | 15.931297  | -4.646582 | -0.190413 |
| H | 16.622588  | -5.111693 | 4.032730  |
| C | 13.516402  | -3.317992 | 6.989935  |
| H | 11.691567  | -2.216948 | 7.327308  |
| H | 15.295696  | -4.368172 | 6.372176  |
| N | 12.765414  | 3.116773  | -2.483385 |
| N | 12.929328  | -2.892251 | 2.896868  |
| N | -12.929410 | 2.891861  | 2.897212  |
| N | -12.765310 | -3.116447 | -2.483843 |
| H | -17.085671 | -2.318946 | -5.343161 |
| H | -13.711094 | 3.451335  | 8.049943  |
| H | -17.318370 | 5.487193  | 1.680075  |
| H | -13.407700 | -8.318422 | -2.475340 |
| H | 13.710818  | -3.452661 | 8.049526  |
| H | 17.318222  | -5.487551 | 1.679426  |
| H | 13.407659  | 8.318767  | -2.474628 |
| H | 17.086027  | 2.319525  | -5.342403 |

### Compound G3F2

|   |          |           |           |
|---|----------|-----------|-----------|
| H | 4.344476 | 2.132695  | -1.021593 |
| C | 7.147757 | -1.831539 | -1.155467 |
| C | 7.636624 | -0.594998 | -0.710231 |
| C | 6.757806 | 0.463644  | -0.434522 |
| C | 5.396057 | 0.268779  | -0.619521 |
| C | 4.899715 | -0.976682 | -1.061748 |
| C | 5.778227 | -2.030465 | -1.324612 |
| H | 7.850353 | -2.628285 | -1.376761 |
| H | 7.152516 | 1.408955  | -0.074279 |
| H | 5.410181 | -2.992134 | -1.669262 |
| C | 4.250152 | 1.234753  | -0.397031 |
| H | 4.205383 | 1.583335  | 0.643078  |

|   |           |           |           |   |            |           |           |
|---|-----------|-----------|-----------|---|------------|-----------|-----------|
| C | 3.037937  | 0.405508  | -0.771667 | C | -11.177844 | -0.381252 | -0.783519 |
| C | 1.696803  | 0.759087  | -0.764113 | C | -9.515338  | 2.146489  | 1.234667  |
| C | 0.719504  | -0.180236 | -1.148172 | C | -11.193354 | 0.673067  | 0.207990  |
| C | 1.137060  | -1.470210 | -1.532743 | C | -10.470144 | -2.239403 | -2.740067 |
| C | 2.481642  | -1.832500 | -1.538404 | H | -8.445048  | -1.523642 | -2.542100 |
| C | 3.439025  | -0.890484 | -1.156237 | C | -12.165916 | -1.209150 | -1.325158 |
| H | 1.391424  | 1.749323  | -0.438310 | C | -10.531877 | 2.704921  | 2.001218  |
| H | 0.392797  | -2.190184 | -1.858206 | H | -8.492490  | 2.492510  | 1.331199  |
| H | 2.772699  | -2.832272 | -1.847707 | C | -12.198320 | 1.233985  | 1.001957  |
| H | -4.205613 | -1.582630 | 0.643229  | C | -11.807130 | -2.134238 | -2.305158 |
| C | -1.137260 | 1.470553  | -1.533084 | H | -10.229404 | -2.955793 | -3.518468 |
| C | -0.719698 | 0.180666  | -1.148226 | H | -13.197906 | -1.144852 | -0.995471 |
| C | -1.696998 | -0.758592 | -0.764015 | C | -11.863529 | 2.254771  | 1.891261  |
| C | -3.038137 | -0.405032 | -0.771693 | H | -10.307299 | 3.505583  | 2.698029  |
| C | -3.439231 | 0.890872  | -1.156545 | H | -13.223699 | 0.883162  | 0.944306  |
| C | -2.481846 | 1.832823  | -1.538869 | N | 9.040209   | -0.411746 | -0.536966 |
| H | -0.392997 | 2.190470  | -1.858674 | N | -9.040435  | 0.412167  | -0.537416 |
| H | -1.391620 | -1.748758 | -0.438000 | C | 12.926880  | -2.814859 | 4.096039  |
| H | -2.772904 | 2.832529  | -1.848387 | C | 13.964846  | -3.588710 | 2.239365  |
| C | -4.250352 | -1.234226 | -0.396940 | C | 12.069232  | -2.182004 | 4.999828  |
| H | -4.344641 | -2.132275 | -1.021353 | C | 14.065558  | -3.537473 | 4.536625  |
| C | -5.396263 | -0.268313 | -0.619659 | C | 14.324363  | -3.914739 | 0.929023  |
| C | -6.758018 | -0.463160 | -0.434680 | C | 14.729827  | -4.031677 | 3.349003  |
| C | -7.636834 | 0.595410  | -0.710659 | C | 12.351633  | -2.300161 | 6.356226  |
| C | -7.147980 | 1.831861  | -1.156143 | H | 11.203944  | -1.624871 | 4.658310  |
| C | -5.778444 | 2.030776  | -1.325271 | C | 14.344654  | -3.625810 | 5.903859  |
| C | -4.899929 | 0.977064  | -1.062133 | C | 15.463286  | -4.689926 | 0.740300  |
| H | -7.152738 | -1.408404 | -0.074273 | H | 13.727653  | -3.588752 | 0.084329  |
| H | -7.850589 | 2.628543  | -1.377628 | C | 15.885875  | -4.789034 | 3.136984  |
| H | -5.410395 | 2.992376  | -1.670113 | C | 13.480159  | -3.013050 | 6.811447  |
| C | 9.832873  | 0.513549  | -1.216900 | H | 11.694992  | -1.842319 | 7.088381  |
| C | 9.857539  | -1.136227 | 0.331407  | H | 15.220687  | -4.153802 | 6.266391  |
| C | 9.469776  | 1.439973  | -2.198563 | C | 16.247455  | -5.120280 | 1.830753  |
| C | 11.177642 | 0.381607  | -0.783107 | H | 15.760130  | -4.981365 | -0.261569 |
| C | 9.515173  | -2.146293 | 1.234901  | H | 16.502308  | -5.118317 | 3.967142  |
| C | 11.193170 | -0.672833 | 0.208275  | C | 13.882549  | 2.562948  | -3.655813 |
| C | 10.469950 | 2.239906  | -2.739508 | C | 12.838567  | 4.372806  | -2.785762 |
| H | 8.444824  | 1.524264  | -2.541480 | C | 14.250508  | 1.271558  | -4.042218 |
| C | 12.165739 | 1.209465  | -1.324761 | C | 14.628241  | 3.698931  | -4.063515 |
| C | 10.531743 | -2.704849 | 2.001320  | C | 11.982196  | 5.238974  | -2.100800 |
| H | 8.492323  | -2.492293 | 1.331478  | C | 13.960140  | 4.856808  | -3.507559 |
| C | 12.198169 | -1.233856 | 1.002126  | C | 15.378538  | 1.128528  | -4.842550 |
| C | 11.806954 | 2.134627  | -2.304688 | H | 13.668024  | 0.407328  | -3.742818 |
| H | 10.229218 | 2.956359  | -3.517854 | C | 15.773601  | 3.532057  | -4.848037 |
| H | 13.197749 | 1.145064  | -0.995156 | C | 12.248720  | 6.602227  | -2.164263 |
| C | 11.863407 | -2.254735 | 1.891337  | H | 11.129934  | 4.863940  | -1.545090 |
| H | 10.307176 | -3.505594 | 2.698039  | C | 14.223397  | 6.229613  | -3.541085 |
| H | 13.223548 | -0.883039 | 0.944451  | C | 16.143629  | 2.245005  | -5.239358 |
| C | -9.833093 | -0.513085 | -1.217406 | H | 15.681508  | 0.143204  | -5.180396 |
| C | -9.857730 | 1.136498  | 0.331098  | H | 16.375757  | 4.382090  | -5.152011 |
| C | -9.469991 | -1.439434 | -2.199134 | C | 13.360279  | 7.100221  | -2.875102 |

|   |            |           |           |   |           |            |            |
|---|------------|-----------|-----------|---|-----------|------------|------------|
| H | 11.592931  | 7.306703  | -1.663697 | C | 13.427491 | 9.948845   | -6.351303  |
| H | 15.086437  | 6.624528  | -4.067273 | H | 13.166761 | 7.913775   | -5.664837  |
| C | -12.838406 | -4.372502 | -2.786523 | C | 13.909748 | 11.638092  | -4.672428  |
| C | -13.882956 | -2.562651 | -3.655913 | C | 14.401005 | 11.320979  | 0.036889   |
| C | -11.981748 | -5.238665 | -2.101912 | H | 14.332688 | 9.743698   | 1.507875   |
| C | -13.960016 | -4.856566 | -3.508218 | H | 14.429406 | 12.689213  | -1.629751  |
| C | -14.251267 | -1.271253 | -4.041961 | C | 13.693864 | 11.283773  | -6.000839  |
| C | -14.628482 | -3.698694 | -4.063744 | H | 13.256730 | 9.694340   | -7.393288  |
| C | -12.248017 | -6.601953 | -2.165638 | H | 14.109712 | 12.671474  | -4.403515  |
| H | -11.129453 | -4.863602 | -1.546274 | H | 14.613635 | 12.090450  | 0.772647   |
| C | -14.223027 | -6.229412 | -3.541995 | H | 13.729471 | 12.043919  | -6.775145  |
| C | -15.379483 | -1.128280 | -4.842040 | C | 17.498047 | 2.579960   | -7.329241  |
| H | -13.668905 | -0.406964 | -3.742497 | C | 18.422016 | 1.296623   | -5.703468  |
| C | -15.774031 | -3.531887 | -4.848003 | C | 16.648027 | 3.374806   | -8.102996  |
| C | -13.359619 | -7.100008 | -2.876372 | C | 18.765864 | 2.160531   | -7.808627  |
| H | -11.591985 | -7.306412 | -1.665368 | C | 18.692011 | 0.601918   | -4.521240  |
| H | -15.086106 | -6.624365 | -4.068091 | C | 19.355786 | 1.341018   | -6.770729  |
| C | -16.144417 | -2.244827 | -5.238960 | C | 17.092414 | 3.759411   | -9.365912  |
| H | -15.682710 | -0.142943 | -5.179616 | H | 15.674448 | 3.678886   | -7.734349  |
| H | -16.376056 | -4.381988 | -5.152048 | C | 19.187544 | 2.562484   | -9.081454  |
| C | -13.964752 | 3.589002  | 2.239590  | C | 19.911261 | -0.064981  | -4.426337  |
| C | -12.927103 | 2.814286  | 4.096073  | H | 17.979119 | 0.586261   | -3.704022  |
| C | -14.324101 | 3.915527  | 0.929328  | C | 20.573371 | 0.661281   | -6.648341  |
| C | -14.729734 | 4.031746  | 3.349318  | C | 18.349658 | 3.362245   | -9.852834  |
| C | -12.069639 | 2.180957  | 4.999704  | H | 16.450676 | 4.378318   | -9.986218  |
| C | -14.065669 | 3.536980  | 4.536823  | H | 20.155959 | 2.251177   | -9.462800  |
| C | -15.462852 | 4.691005  | 0.740768  | C | 20.843882 | -0.040781  | -5.477549  |
| H | -13.727385 | 3.589694  | 0.084578  | H | 20.144975 | -0.612725  | -3.517985  |
| C | -15.885616 | 4.789401  | 3.137454  | H | 21.299038 | 0.684803   | -7.456400  |
| C | -12.352129 | 2.298681  | 6.356121  | H | 18.666878 | 3.681485   | -10.840801 |
| H | -11.204420 | 1.623798  | 4.658051  | H | 21.784414 | -0.572529  | -5.371643  |
| C | -14.344861 | 3.624874  | 5.904066  | C | 17.641091 | -7.197307  | 2.068937   |
| C | -16.247023 | 5.121151  | 1.831302  | C | 18.521743 | -5.507988  | 0.838280   |
| H | -15.759549 | 4.982838  | -0.261030 | C | 16.813624 | -8.015492  | 2.842799   |
| H | -16.502073 | 5.118510  | 3.967662  | C | 18.912529 | -7.637514  | 1.618834   |
| C | -13.480560 | 3.011615  | 6.811504  | C | 18.763226 | -4.296095  | 0.185399   |
| H | -11.695632 | 1.840457  | 7.088166  | C | 19.474768 | -6.559041  | 0.832991   |
| H | -15.220821 | 4.152902  | 6.266722  | C | 17.284624 | -9.283444  | 3.175462   |
| N | -12.799141 | -2.981010 | -2.881721 | H | 15.837007 | -7.676254  | 3.170345   |
| N | -12.873418 | 2.851329  | 2.701990  | C | 19.361216 | -8.916513  | 1.968575   |
| N | 12.873309  | -2.851438 | 2.701929  | C | 19.973327 | -4.154539  | -0.489880  |
| N | 12.798982  | 2.981352  | -2.881302 | H | 18.035909 | -3.491842  | 0.207241   |
| C | 13.850500  | 9.319107  | -1.805235 | C | 20.682663 | -6.389517  | 0.146124   |
| C | 13.602562  | 9.302656  | -4.059238 | C | 18.546030 | -9.732172  | 2.747608   |
| C | 13.964445  | 8.970640  | -0.456674 | H | 16.660896 | -9.937962  | 3.777303   |
| C | 14.021166  | 10.656964 | -2.245935 | H | 20.332818 | -9.268119  | 1.633153   |
| C | 13.376430  | 8.941872  | -5.390201 | C | 20.924767 | -5.188737  | -0.514425  |
| C | 13.862873  | 10.646465 | -3.685387 | H | 20.184917 | -3.222391  | -1.005719  |
| C | 14.239038  | 9.988458  | 0.453836  | H | 21.422616 | -7.184761  | 0.132363   |
| H | 13.848459  | 7.942737  | -0.130543 | H | 18.884382 | -10.725324 | 3.026525   |
| C | 14.296117  | 11.659934 | -1.308869 | H | 21.857430 | -5.046009  | -1.051394  |



|   |            |           |           |   |            |            |            |
|---|------------|-----------|-----------|---|------------|------------|------------|
| C | 13.968997  | -2.033213 | 9.072141  | C | -20.681720 | 6.391886   | 0.146465   |
| C | 13.773841  | -4.289547 | 8.955051  | C | -18.545052 | 9.732995   | 2.749885   |
| C | 14.047521  | -0.667809 | 8.784714  | H | -16.660084 | 9.938013   | 3.780034   |
| C | 14.164816  | -2.530279 | 10.386581 | H | -20.331699 | 9.269728   | 1.634877   |
| C | 13.574911  | -5.607882 | 8.536452  | C | -20.923897 | 5.191454   | -0.514689  |
| C | 14.040165  | -3.971054 | 10.311817 | H | -20.184269 | 3.225219   | -1.006764  |
| C | 14.311556  | 0.201619  | 9.840519  | H | -21.421544 | 7.187253   | 0.132940   |
| H | 13.912888  | -0.298229 | 7.773971  | H | -18.883300 | 10.726072  | 3.029196   |
| C | 14.428660  | -1.633709 | 11.428740 | H | -21.856483 | 5.049127   | -1.051898  |
| C | 13.659678  | -6.612102 | 9.498026  | C | -17.499140 | -2.579650  | -7.328659  |
| H | 13.360118  | -5.840905 | 7.499200  | C | -18.423023 | -1.296692  | -5.702533  |
| C | 14.120925  | -5.000495 | 11.257040 | C | -16.649141 | -3.374252  | -8.102686  |
| C | 14.497964  | -0.271772 | 11.150799 | C | -18.767073 | -2.160287  | -7.807789  |
| H | 14.377569  | 1.267701  | 9.643588  | C | -18.692946 | -0.602223  | -4.520148  |
| H | 14.580757  | -1.997911 | 12.440859 | C | -19.356941 | -1.341020  | -6.769666  |
| C | 13.932502  | -6.316317 | 10.844798 | C | -17.093668 | -3.758684  | -9.365605  |
| H | 13.510397  | -7.645240 | 9.198013  | H | -15.675467 | -3.678282  | -7.734250  |
| H | 14.325526  | -4.773653 | 12.299565 | C | -19.188899 | -2.562063  | -9.080624  |
| H | 14.701468  | 0.433039  | 11.951102 | C | -19.912262 | 0.064514   | -4.424966  |
| H | 13.994549  | -7.123191 | 11.568497 | H | -17.979954 | -0.586625  | -3.703016  |
| C | -13.969823 | 2.031022  | 9.071774  | C | -20.574591 | -0.661452  | -6.646998  |
| C | -13.774150 | 4.287356  | 8.955572  | C | -18.351032 | -3.361586  | -9.852272  |
| C | -14.048644 | 0.665747  | 8.783810  | H | -16.451944 | -4.377400  | -9.986115  |
| C | -14.165637 | 2.527620  | 10.386391 | H | -20.157406 | -2.250792  | -9.461766  |
| C | -13.574890 | 5.605807  | 8.537499  | C | -20.845026 | 0.040383   | -5.476053  |
| C | -14.040653 | 3.968398  | 10.312195 | H | -20.145918 | 0.612065   | -3.516483  |
| C | -14.312981 | -0.204029 | 9.839253  | H | -21.300366 | -0.684935  | -7.454961  |
| H | -13.913994 | 0.296527  | 7.772937  | H | -18.668357 | -3.680690  | -10.840248 |
| C | -14.429785 | 1.630706  | 11.428178 | H | -21.785608 | 0.571999   | -5.369927  |
| C | -13.659504 | 6.609675  | 9.499454  | C | -13.601943 | -9.302194  | -4.060965  |
| H | -13.359959 | 5.839181  | 7.500354  | C | -13.848720 | -9.319297  | -1.806835  |
| C | -14.121264 | 4.997493  | 11.257807 | C | -13.376613 | -8.941014  | -5.391959  |
| C | -14.499392 | 0.268895  | 11.149702 | C | -13.861606 | -10.646184 | -3.687318  |
| H | -14.379228 | -1.270018 | 9.641900  | C | -13.962099 | -8.971222  | -0.458122  |
| H | -14.581882 | 1.994551  | 12.440425 | C | -14.019158 | -10.657100 | -2.247790  |
| C | -13.932508 | 6.313431  | 10.846090 | C | -13.427822 | -9.947772  | -6.353279  |
| H | -13.509964 | 7.642894  | 9.199851  | H | -13.167426 | -7.912784  | -5.666462  |
| H | -14.326004 | 4.770295  | 12.300227 | C | -13.908649 | -11.637588 | -4.674573  |
| H | -14.703137 | -0.436180 | 11.949710 | C | -14.235868 | -9.989372  | 0.452261   |
| H | -13.994435 | 7.120039  | 11.570097 | H | -13.846306 | -7.943364  | -0.131785  |
| C | -17.640374 | 7.198294  | 2.070221  | C | -14.293279 | -11.660411 | -1.310847  |
| C | -18.521066 | 5.509691  | 0.838606  | C | -13.693564 | -11.282876 | -6.003008  |
| C | -16.812931 | 8.015998  | 2.844619  | H | -13.257677 | -9.692953  | -7.395288  |
| C | -18.911658 | 7.638911  | 1.620083  | H | -14.108121 | -12.671101 | -4.405799  |
| C | -18.762629 | 4.298140  | 0.185119  | C | -14.397586 | -11.321842 | 0.035052   |
| C | -19.473924 | 6.560895  | 0.833632  | H | -14.329064 | -9.744919  | 1.506412   |
| C | -17.283799 | 9.283871  | 3.177772  | H | -14.426385 | -12.689651 | -1.631930  |
| H | -15.836429 | 7.676464  | 3.172204  | H | -13.729306 | -12.042845 | -6.777481  |
| C | -19.360216 | 8.917818  | 1.970324  | H | -14.609571 | -12.091576 | 0.770723   |
| C | -19.972628 | 4.157092  | -0.490449 | N | 13.596637  | 8.503860   | -2.911794  |
| H | -18.035452 | 3.493756  | 0.206727  | N | 17.297114  | 2.050647   | -6.050577  |

|   |            |           |           |
|---|------------|-----------|-----------|
| N | 17.411468  | -5.903568 | 1.590252  |
| N | 13.732025  | -3.107367 | 8.209597  |
| N | -13.732544 | 3.105456  | 8.209665  |
| N | -17.410867 | 5.904741  | 1.590969  |
| N | -17.298086 | -2.050541 | -6.049925 |
| N | -13.595712 | -8.503680 | -2.913323 |

|   |            |           |           |
|---|------------|-----------|-----------|
| C | 13.715486  | 1.643003  | 0.611960  |
| C | 14.252967  | -0.410945 | -0.190580 |
| C | 13.057670  | 2.817979  | 0.986624  |
| C | 15.120637  | 1.503557  | 0.747518  |
| C | 14.226700  | -1.706675 | -0.713933 |
| C | 15.463315  | 0.192843  | 0.236515  |
| C | 13.826784  | 3.849780  | 1.519899  |
| H | 11.986112  | 2.926952  | 0.861585  |
| C | 15.869306  | 2.555989  | 1.286956  |
| C | 15.437756  | -2.386353 | -0.822801 |
| H | 13.296006  | -2.170489 | -1.021084 |
| C | 16.666185  | -0.512806 | 0.115646  |
| C | 15.217909  | 3.723154  | 1.674171  |
| H | 13.337956  | 4.772265  | 1.819352  |
| H | 16.946008  | 2.463071  | 1.397181  |
| C | 16.647944  | -1.798161 | -0.417214 |
| H | 15.442989  | -3.394036 | -1.227917 |
| H | 17.600978  | -0.062883 | 0.437877  |
| C | -13.958954 | -0.221059 | 1.013137  |
| C | -14.010761 | 1.344320  | -0.629227 |
| C | -13.594859 | -1.241203 | 1.896440  |
| C | -15.273118 | 0.312735  | 0.995832  |
| C | -13.691084 | 2.231654  | -1.660706 |
| C | -15.305714 | 1.312569  | -0.051039 |
| C | -14.564335 | -1.709925 | 2.780141  |
| H | -12.594171 | -1.658919 | 1.891286  |
| C | -16.227527 | -0.176238 | 1.895465  |
| C | -14.696163 | 3.079446  | -2.120622 |
| H | -12.694295 | 2.263674  | -2.086410 |
| C | -16.297049 | 2.175388  | -0.532922 |
| C | -15.867268 | -1.183175 | 2.785883  |
| H | -14.305399 | -2.501937 | 3.476754  |
| H | -17.237796 | 0.223060  | 1.894419  |
| C | -15.988091 | 3.052666  | -1.567981 |
| H | -14.472580 | 3.777133  | -2.922381 |
| H | -17.293571 | 2.162030  | -0.100652 |
| N | 13.194866  | 0.475932  | 0.040968  |
| N | -13.197843 | 0.409981  | 0.022763  |
| H | -0.007463  | 0.888461  | -1.870856 |
| C | -3.016558  | -1.398228 | 1.155139  |
| C | -3.484815  | -0.872148 | -0.065266 |
| C | -2.541421  | -0.457021 | -1.026321 |
| C | -1.185008  | -0.570587 | -0.761319 |
| C | -0.731713  | -1.098878 | 0.465888  |
| C | -1.655406  | -1.514065 | 1.427733  |
| H | -3.736493  | -1.746457 | 1.889388  |
| H | -2.884395  | -0.022598 | -1.961243 |
| H | -1.325217  | -1.932019 | 2.374590  |
| C | -0.002123  | -0.181959 | -1.626034 |
| H | 0.001269   | -0.719169 | -2.583674 |
| C | 1.183527   | -0.558585 | -0.759791 |

### Compound G1F3

|   |            |           |           |
|---|------------|-----------|-----------|
| H | 8.174859   | 1.145026  | 1.808840  |
| C | 11.438853  | -0.119749 | -1.551743 |
| C | 11.825453  | 0.229996  | -0.248527 |
| C | 10.865018  | 0.336116  | 0.770492  |
| C | 9.532096   | 0.098174  | 0.466075  |
| C | 9.143435   | -0.265548 | -0.841006 |
| C | 10.102151  | -0.378346 | -1.850530 |
| H | 12.195272  | -0.176737 | -2.327257 |
| H | 11.179620  | 0.590244  | 1.778018  |
| H | 9.817614   | -0.650355 | -2.862789 |
| C | 8.318646   | 0.147691  | 1.372731  |
| H | 8.408310   | -0.549661 | 2.216011  |
| C | 7.187266   | -0.231832 | 0.437841  |
| C | 5.831148   | -0.349719 | 0.703413  |
| C | 4.939480   | -0.708566 | -0.327117 |
| C | 5.458993   | -0.940714 | -1.616408 |
| C | 6.819621   | -0.822254 | -1.889911 |
| C | 7.691025   | -0.465833 | -0.858550 |
| H | 5.445455   | -0.140295 | 1.697215  |
| H | 4.783094   | -1.245446 | -2.409378 |
| H | 7.190493   | -1.016064 | -2.892518 |
| H | -8.186474  | 1.088881  | 1.792754  |
| C | -5.457540  | -1.000860 | -1.619134 |
| C | -4.939641  | -0.755718 | -0.331629 |
| C | -5.833554  | -0.396103 | 0.696584  |
| C | -7.190673  | -0.291130 | 0.430800  |
| C | -7.693066  | -0.538368 | -0.863679 |
| C | -6.819161  | -0.894707 | -1.892985 |
| H | -4.779244  | -1.305390 | -2.410166 |
| H | -5.448877  | -0.176043 | 1.688495  |
| H | -7.188732  | -1.097431 | -2.894310 |
| C | -8.324205  | 0.087928  | 1.363120  |
| H | -8.409687  | -0.604486 | 2.210936  |
| C | -9.537466  | 0.023141  | 0.457334  |
| C | -10.868052 | 0.283442  | 0.753255  |
| C | -11.828872 | 0.155614  | -0.262665 |
| C | -11.443423 | -0.221242 | -1.558484 |
| C | -10.103691 | -0.462865 | -1.858445 |
| C | -9.146636  | -0.345489 | -0.847778 |
| H | -11.178294 | 0.592670  | 1.746639  |
| H | -12.205751 | -0.331790 | -2.322381 |
| H | -9.819071  | -0.751889 | -2.865952 |

|   |            |           |           |
|---|------------|-----------|-----------|
| C | 2.539021   | -0.431294 | -1.023109 |
| C | 3.485603   | -0.838364 | -0.061671 |
| C | 3.021064   | -1.370157 | 1.157725  |
| C | 1.660816   | -1.498830 | 1.429062  |
| C | 0.734067   | -1.091797 | 0.466667  |
| H | 2.878426   | 0.007454  | -1.957290 |
| H | 1.333791   | -1.920662 | 2.375301  |
| H | 3.743354   | -1.712744 | 1.892298  |
| H | 17.574599  | -2.354817 | -0.517446 |
| H | 15.787622  | 4.545854  | 2.095105  |
| H | -16.598547 | -1.569767 | 3.489018  |
| H | -16.748920 | 3.725763  | -1.950991 |

### Compound G2F3

|   |            |           |           |
|---|------------|-----------|-----------|
| H | 8.169509   | 0.316830  | 1.404543  |
| C | 11.454011  | -0.233253 | -2.128377 |
| C | 11.830199  | -0.157523 | -0.779357 |
| C | 10.866490  | -0.260349 | 0.235859  |
| C | 9.535280   | -0.429747 | -0.117782 |
| C | 9.154384   | -0.515357 | -1.474534 |
| C | 10.118262  | -0.420949 | -2.481189 |
| H | 12.216155  | -0.134603 | -2.894394 |
| H | 11.176655  | -0.216730 | 1.275588  |
| H | 9.839177   | -0.480013 | -3.528990 |
| C | 8.317211   | -0.568833 | 0.772666  |
| H | 8.403560   | -1.425310 | 1.454069  |
| C | 7.191864   | -0.747390 | -0.227021 |
| C | 5.834708   | -0.919895 | 0.001236  |
| C | 4.949483   | -1.056838 | -1.086337 |
| C | 5.475222   | -1.013434 | -2.393258 |
| C | 6.836895   | -0.839961 | -2.629019 |
| C | 7.702047   | -0.706426 | -1.541012 |
| H | 5.443491   | -0.923239 | 1.014681  |
| H | 4.803437   | -1.146647 | -3.235412 |
| H | 7.213064   | -0.820700 | -3.648003 |
| H | -8.183127  | 0.187974  | 1.377887  |
| C | -5.447040  | -1.051831 | -2.422112 |
| C | -4.928915  | -1.106978 | -1.112518 |
| C | -5.822984  | -0.995324 | -0.029191 |
| C | -7.180725  | -0.837263 | -0.263991 |
| C | -7.682786  | -0.781969 | -1.580580 |
| C | -6.808884  | -0.889412 | -2.664486 |
| H | -4.768861  | -1.166404 | -3.261850 |
| H | -5.438683  | -1.007442 | 0.986802  |
| H | -7.178442  | -0.859084 | -3.685622 |
| C | -8.314850  | -0.689136 | 0.730767  |
| H | -8.394349  | -1.557682 | 1.397616  |
| C | -9.528855  | -0.552423 | -0.165633 |
| C | -10.861333 | -0.380403 | 0.181737  |
| C | -11.820871 | -0.279314 | -0.837901 |

|   |            |           |           |
|---|------------|-----------|-----------|
| C | -11.436075 | -0.341524 | -2.185346 |
| C | -10.094417 | -0.494682 | -2.532159 |
| C | -9.137293  | -0.606304 | -1.520905 |
| H | -11.172521 | -0.312369 | 1.219761  |
| H | -12.198401 | -0.279571 | -2.954892 |
| H | -9.808802  | -0.539771 | -3.578904 |
| C | 13.725416  | 1.086370  | 0.302092  |
| C | 14.248837  | -0.836242 | -0.773406 |
| C | 13.076368  | 2.203644  | 0.834933  |
| C | 15.126273  | 0.909830  | 0.439756  |
| C | 14.215814  | -2.043815 | -1.476269 |
| C | 15.460742  | -0.319617 | -0.247225 |
| C | 13.845932  | 3.140865  | 1.515132  |
| H | 12.009335  | 2.348230  | 0.708720  |
| C | 15.879039  | 1.851341  | 1.148307  |
| C | 15.416596  | -2.718132 | -1.668319 |
| H | 13.286785  | -2.440815 | -1.869533 |
| C | 16.654445  | -1.023568 | -0.432228 |
| C | 15.235469  | 2.967857  | 1.682517  |
| H | 13.379132  | 4.031234  | 1.922790  |
| H | 16.947694  | 1.726073  | 1.289340  |
| C | 16.629939  | -2.218985 | -1.151062 |
| H | 15.432216  | -3.646615 | -2.229140 |
| H | 17.590774  | -0.661524 | -0.020115 |
| C | -13.954577 | -0.974013 | 0.290966  |
| C | -14.010543 | 0.950112  | -0.901943 |
| C | -13.588930 | -2.180188 | 0.895158  |
| C | -15.273566 | -0.463573 | 0.400536  |
| C | -13.696207 | 2.070799  | -1.675645 |
| C | -15.309126 | 0.766600  | -0.361466 |
| C | -14.557795 | -2.866901 | 1.618448  |
| H | -12.587351 | -2.581529 | 0.790291  |
| C | -16.227289 | -1.156739 | 1.152143  |
| C | -14.705869 | 2.993516  | -1.925965 |
| H | -12.700532 | 2.215100  | -2.079454 |
| C | -16.304576 | 1.717690  | -0.604593 |
| C | -15.866512 | -2.360457 | 1.758021  |
| H | -14.314612 | -3.817266 | 2.081589  |
| H | -17.235699 | -0.774115 | 1.271329  |
| C | -16.002125 | 2.825884  | -1.396287 |
| H | -14.503728 | 3.861761  | -2.544047 |
| H | -17.298758 | 1.611020  | -0.183049 |
| N | 13.200900  | 0.023473  | -0.436398 |
| N | -13.194351 | -0.110869 | -0.501676 |
| C | 18.092395  | -4.248634 | -0.932284 |
| C | 18.960942  | -2.478586 | -2.052838 |
| C | 17.280600  | -5.110041 | -0.189164 |
| C | 19.397290  | -4.624346 | -1.343582 |
| C | 19.166811  | -1.249281 | -2.684791 |
| C | 19.951699  | -3.494244 | -2.059366 |
| C | 17.790135  | -6.367223 | 0.127134  |

|   |            |           |           |                      |            |           |           |
|---|------------|-----------|-----------|----------------------|------------|-----------|-----------|
| H | 16.290129  | -4.808621 | 0.133956  | C                    | -15.948396 | 5.858755  | -0.673078 |
| C | 19.883861  | -5.894276 | -1.011970 | C                    | -18.129723 | 5.790320  | -1.806386 |
| C | 20.390950  | -1.043254 | -3.316736 | C                    | -19.955106 | 2.394743  | -3.492362 |
| H | 18.399088  | -0.483233 | -2.685652 | H                    | -18.144433 | 1.436060  | -2.799164 |
| C | 21.173475  | -3.259671 | -2.701205 | C                    | -20.189195 | 4.775326  | -3.066749 |
| C | 19.076673  | -6.760366 | -0.280352 | C                    | -16.146521 | 7.221815  | -0.465081 |
| H | 17.179025  | -7.055683 | 0.703541  | H                    | -15.053274 | 5.361428  | -0.315757 |
| H | 20.880654  | -6.197605 | -1.319452 | C                    | -18.302498 | 7.161486  | -1.583901 |
| C | 21.387803  | -2.034203 | -3.324924 | C                    | -20.691439 | 3.587989  | -3.590761 |
| H | 20.576045  | -0.095706 | -3.814282 | H                    | -20.362130 | 1.479849  | -3.912986 |
| H | 21.942717  | -4.026686 | -2.714221 | H                    | -20.756821 | 5.697857  | -3.149697 |
| C | 17.029198  | 4.717151  | 1.879273  | C                    | -17.308539 | 7.871061  | -0.916548 |
| C | 15.783892  | 4.312843  | 3.730781  | H                    | -15.386126 | 7.792227  | 0.060379  |
| C | 17.570026  | 4.725445  | 0.590735  | H                    | -19.203341 | 7.663739  | -1.925109 |
| C | 17.509312  | 5.585121  | 2.893771  | N                    | -16.823653 | -3.092127 | 2.516488  |
| C | 14.870910  | 3.807664  | 4.660538  | N                    | -17.005839 | 3.795211  | -1.677551 |
| C | 16.714095  | 5.327076  | 4.076064  | N                    | 17.835329  | -2.945134 | -1.367009 |
| C | 18.614302  | 5.610348  | 0.332720  | N                    | 15.981715  | 3.948316  | 2.395984  |
| H | 17.187879  | 4.068147  | -0.182667 | H                    | 0.003867   | 0.845048  | -2.242812 |
| C | 18.560569  | 6.463884  | 2.606932  | C                    | -3.005662  | -2.065603 | 0.191537  |
| C | 14.891177  | 4.344977  | 5.945552  | C                    | -3.473819  | -1.278362 | -0.879176 |
| H | 14.173372  | 3.021763  | 4.391896  | C                    | -2.530768  | -0.656428 | -1.721811 |
| C | 16.712170  | 5.849128  | 5.374889  | C                    | -1.174234  | -0.825403 | -1.488269 |
| C | 19.109601  | 6.470303  | 1.328201  | C                    | -0.721412  | -1.615125 | -0.410485 |
| H | 19.052577  | 5.635300  | -0.660723 | C                    | -1.644653  | -2.237669 | 0.432483  |
| H | 18.940239  | 7.133945  | 3.373107  | H                    | -3.725175  | -2.572054 | 0.827401  |
| C | 15.798634  | 5.357283  | 6.302535  | H                    | -2.873404  | -0.023504 | -2.535728 |
| H | 14.191325  | 3.969822  | 6.686636  | H                    | -1.314392  | -2.857564 | 1.261225  |
| H | 17.417794  | 6.626177  | 5.655017  | C                    | 0.009185   | -0.252972 | -2.243414 |
| C | -16.713890 | -3.421310 | 3.870546  | H                    | 0.013257   | -0.562502 | -3.296901 |
| C | -18.030082 | -3.608419 | 2.033204  | C                    | 1.194420   | -0.813635 | -1.482327 |
| C | -15.700649 | -3.104697 | 4.779562  | C                    | 2.550420   | -0.631605 | -1.709249 |
| C | -17.861782 | -4.157761 | 4.261955  | C                    | 3.494952   | -1.242303 | -0.860203 |
| C | -18.563340 | -3.554066 | 0.742626  | C                    | 3.029498   | -2.032011 | 0.209742  |
| C | -18.702244 | -4.276961 | 3.088805  | C                    | 1.669015   | -2.218579 | 0.442977  |
| C | -15.844951 | -3.550795 | 6.091239  | C                    | 0.744065   | -1.607221 | -0.406306 |
| H | -14.834053 | -2.527899 | 4.475324  | H                    | 2.891406   | 0.002992  | -2.522598 |
| C | -17.980790 | -4.593684 | 5.586815  | H                    | 1.340579   | -2.840595 | 1.270850  |
| C | -19.793675 | -4.169566 | 0.524115  | H                    | 3.751138   | -2.528898 | 0.850771  |
| H | -18.036329 | -3.052834 | -0.061874 | H                    | 22.331846  | -1.840212 | -3.824725 |
| C | -19.937931 | -4.886438 | 2.841141  | H                    | 19.443245  | -7.748022 | -0.017968 |
| C | -16.970151 | -4.290462 | 6.494297  | H                    | 19.926358  | 7.146223  | 1.094388  |
| H | -15.071123 | -3.318007 | 6.816999  | H                    | 15.787289  | 5.755084  | 7.312632  |
| H | -18.853253 | -5.158762 | 5.902494  | H                    | -17.431135 | 8.935038  | -0.738815 |
| C | -20.478787 | -4.827310 | 1.560306  | H                    | -21.437248 | -5.294706 | 1.356502  |
| H | -20.230033 | -4.140415 | -0.470052 | H                    | -17.051096 | -4.624102 | 7.524248  |
| H | -20.465589 | -5.401437 | 3.638960  | H                    | -21.659468 | 3.581281  | -4.082203 |
| C | -18.215960 | 3.552066  | -2.335072 |                      |            |           |           |
| C | -16.945617 | 5.153702  | -1.352710 |                      |            |           |           |
| C | -18.710737 | 2.358441  | -2.867471 |                      |            |           |           |
| C | -18.940512 | 4.767853  | -2.433966 |                      |            |           |           |
|   |            |           |           | <b>Compound G3F3</b> |            |           |           |
|   |            |           |           | H                    | 8.155801   | -0.131070 | 0.812729  |

|   |            |           |           |   |            |           |           |
|---|------------|-----------|-----------|---|------------|-----------|-----------|
| C | 11.459195  | -0.591993 | -2.716762 | H | 13.258483  | -2.867389 | -2.399093 |
| C | 11.827048  | -0.551964 | -1.364512 | C | 16.638758  | -1.467735 | -0.969320 |
| C | 10.859484  | -0.679326 | -0.356246 | C | 15.245178  | 2.571954  | 1.075625  |
| C | 9.529806   | -0.838584 | -0.720587 | H | 13.398327  | 3.661135  | 1.279695  |
| C | 9.156238   | -0.888169 | -2.081417 | H | 16.948695  | 1.305202  | 0.722921  |
| C | 10.124816  | -0.768260 | -3.080916 | C | 16.600063  | -2.673287 | -1.669299 |
| H | 12.225810  | -0.475939 | -3.475989 | H | 15.391550  | -4.107811 | -2.726791 |
| H | 11.164974  | -0.662137 | 0.685750  | H | 17.579236  | -1.110344 | -0.562261 |
| H | 9.850617   | -0.800150 | -4.131093 | C | -13.977234 | -1.402838 | -0.490508 |
| C | 8.306927   | -1.000268 | 0.159194  | C | -13.974619 | 0.625423  | -1.492373 |
| H | 8.389764   | -1.873887 | 0.818874  | C | -13.640623 | -2.667041 | 0.001922  |
| C | 7.187324   | -1.152847 | -0.851106 | C | -15.285443 | -0.872827 | -0.341466 |
| C | 5.829014   | -1.332417 | -0.634946 | C | -13.621710 | 1.804363  | -2.154996 |
| C | 4.950373   | -1.441548 | -1.730820 | C | -15.282921 | 0.426029  | -0.980014 |
| C | 5.483092   | -1.362949 | -3.033461 | C | -14.630097 | -3.396224 | 0.651271  |
| C | 6.845680   | -1.182158 | -3.257000 | H | -12.645305 | -3.075494 | -0.131205 |
| C | 7.704313   | -1.077109 | -2.160697 | C | -16.261231 | -1.613494 | 0.332555  |
| H | 5.431925   | -1.363211 | 0.375689  | C | -14.601286 | 2.777419  | -2.316583 |
| H | 4.816001   | -1.474396 | -3.882413 | H | -12.619487 | 1.955037  | -2.539747 |
| H | 7.227537   | -1.135570 | -4.272955 | C | -16.248004 | 1.426219  | -1.132686 |
| H | -8.186971  | -0.285468 | 0.718252  | C | -15.929066 | -2.875699 | 0.823816  |
| C | -5.440273  | -1.397231 | -3.114223 | H | -14.411725 | -4.389741 | 1.028477  |
| C | -4.926953  | -1.497780 | -1.805179 | H | -17.263320 | -1.223642 | 0.479799  |
| C | -5.824622  | -1.422203 | -0.721838 | C | -15.904082 | 2.596972  | -1.808144 |
| C | -7.181260  | -1.253778 | -0.955994 | H | -14.369539 | 3.696247  | -2.844734 |
| C | -7.677950  | -1.151163 | -2.271600 | H | -17.247868 | 1.310525  | -0.726917 |
| C | -6.800679  | -1.223376 | -3.355737 | N | 13.198635  | -0.382371 | -1.009995 |
| H | -4.759376  | -1.484223 | -3.954995 | N | -13.190642 | -0.488728 | -1.191198 |
| H | -5.443977  | -1.469753 | 0.294406  | C | 18.068874  | -4.686399 | -1.359288 |
| H | -7.166405  | -1.156855 | -4.376511 | C | 18.891430  | -3.014541 | -2.643589 |
| C | -8.318463  | -1.138216 | 0.039364  | C | 17.287660  | -5.486808 | -0.521601 |
| H | -8.403232  | -2.030038 | 0.674058  | C | 19.348973  | -5.106437 | -1.804233 |
| C | -9.528409  | -0.965196 | -0.855929 | C | 19.077214  | -1.835308 | -3.369844 |
| C | -10.861778 | -0.800060 | -0.508392 | C | 19.874935  | -4.037005 | -2.626314 |
| C | -11.814620 | -0.655905 | -1.528506 | C | 17.794572  | -6.726711 | -0.148699 |
| C | -11.426223 | -0.669950 | -2.875524 | H | 16.312027  | -5.158930 | -0.180309 |
| C | -10.083819 | -0.818921 | -3.222172 | C | 19.850891  | -6.346869 | -1.398753 |
| C | -9.132051  | -0.972125 | -2.211167 | C | 20.262283  | -1.690071 | -4.082568 |
| H | -11.178328 | -0.769674 | 0.529958  | H | 18.315932  | -1.063482 | -3.392942 |
| H | -12.185136 | -0.572521 | -3.644986 | C | 21.070655  | -3.861221 | -3.329807 |
| H | -9.793373  | -0.826615 | -4.268436 | C | 19.066995  | -7.158221 | -0.577809 |
| C | 13.729298  | 0.686563  | -0.287802 | H | 17.206486  | -7.385009 | 0.481926  |
| C | 14.236953  | -1.259324 | -1.323322 | H | 20.836516  | -6.682401 | -1.704587 |
| C | 13.086618  | 1.818952  | 0.220262  | C | 21.258457  | -2.688380 | -4.061764 |
| C | 15.127248  | 0.496462  | -0.134400 | H | 20.430914  | -0.798623 | -4.677337 |
| C | 14.191154  | -2.477266 | -2.007747 | H | 21.848746  | -4.617527 | -3.314823 |
| C | 15.452352  | -0.747930 | -0.798089 | C | 17.052144  | 4.309068  | 1.268800  |
| C | 13.859558  | 2.759007  | 0.891978  | C | 15.779695  | 3.948934  | 3.106006  |
| H | 12.022173  | 1.971085  | 0.081998  | C | 17.617626  | 4.288242  | -0.009116 |
| C | 15.883306  | 1.440747  | 0.567011  | C | 17.521161  | 5.197160  | 2.270953  |
| C | 15.384075  | -3.169186 | -2.182706 | C | 14.853156  | 3.467830  | 4.035207  |

|   |            |           |           |   |           |           |           |
|---|------------|-----------|-----------|---|-----------|-----------|-----------|
| C | 16.706969  | 4.967454  | 3.445534  | N | 17.800227 | -3.416925 | -1.872015 |
| C | 18.664329  | 5.165034  | -0.272115 | N | 15.994986 | 3.555984  | 1.783838  |
| H | 17.244514  | 3.622039  | -0.778861 | C | 15.910057 | 4.890840  | 8.160686  |
| C | 18.588815  | 6.056244  | 1.993203  | C | 15.474643 | 6.938551  | 7.288620  |
| C | 14.848453  | 4.036381  | 5.304111  | C | 16.206883 | 3.538062  | 8.348069  |
| H | 14.151340  | 2.683240  | 3.775444  | C | 15.777189 | 5.782856  | 9.255999  |
| C | 16.701792  | 5.510251  | 4.734101  | C | 15.207597 | 8.015955  | 6.439684  |
| C | 19.156367  | 6.039143  | 0.719090  | C | 15.498955 | 7.090310  | 8.699104  |
| H | 19.115049  | 5.190465  | -1.258636 | C | 16.355081 | 3.083169  | 9.656313  |
| H | 18.981854  | 6.728282  | 2.749214  | H | 16.322678 | 2.866481  | 7.504315  |
| C | 15.764300  | 5.048602  | 5.658481  | C | 15.931216 | 5.298450  | 10.560318 |
| H | 14.127596  | 3.704564  | 6.043761  | C | 14.975999 | 9.258915  | 7.024236  |
| H | 17.415885  | 6.273648  | 5.025531  | H | 15.179530 | 7.888362  | 5.363024  |
| C | -16.853211 | -4.057052 | 2.837589  | C | 15.263726 | 8.351315  | 9.259601  |
| C | -18.075016 | -4.179526 | 0.936578  | C | 16.216664 | 3.950157  | 10.753985 |
| C | -15.891939 | -3.766244 | 3.809291  | H | 16.585916 | 2.035979  | 9.828917  |
| C | -17.993934 | -4.846115 | 3.136388  | H | 15.832506 | 5.968318  | 11.409834 |
| C | -18.553317 | -4.067622 | -0.371554 | C | 15.005454 | 9.429971  | 8.419064  |
| C | -18.775275 | -4.924733 | 1.920042  | H | 14.767582 | 10.112582 | 6.385907  |
| C | -16.074453 | -4.293083 | 5.083094  | H | 15.280176 | 8.484529  | 10.337633 |
| H | -15.024543 | -3.158074 | 3.577816  | H | 16.337859 | 3.562947  | 11.760984 |
| C | -18.170717 | -5.347636 | 4.429542  | H | 14.823344 | 10.413029 | 8.842223  |
| C | -19.744798 | -4.711966 | -0.685862 | C | 20.189446 | 8.309428  | 0.413746  |
| H | -18.006722 | -3.510774 | -1.124525 | C | 21.527755 | 6.516260  | 0.046077  |
| C | -19.984219 | -5.545195 | 1.590423  | C | 19.113890 | 9.156965  | 0.691979  |
| C | -17.204491 | -5.075622 | 5.398482  | C | 21.463151 | 8.816766  | 0.048059  |
| H | -15.337315 | -4.107131 | 5.857071  | C | 22.057570 | 5.228446  | -0.070108 |
| H | -19.045541 | -5.934049 | 4.691171  | C | 22.318055 | 7.671527  | -0.186270 |
| C | -20.463773 | -5.440668 | 0.284390  | C | 19.334177 | 10.529964 | 0.610750  |
| H | -20.134634 | -4.666431 | -1.697194 | H | 18.140896 | 8.759226  | 0.959307  |
| H | -20.551103 | -6.101033 | 2.330198  | C | 21.656385 | 10.201330 | -0.025119 |
| C | -18.065415 | 3.518451  | -2.702827 | C | 23.396069 | 5.110385  | -0.437241 |
| C | -16.781156 | 4.926474  | -1.481359 | H | 21.448830 | 4.351868  | 0.123525  |
| C | -18.585100 | 2.424196  | -3.399694 | C | 23.660315 | 7.523170  | -0.555042 |
| C | -18.747378 | 4.762071  | -2.662564 | C | 20.591334 | 11.050993 | 0.258717  |
| C | -15.787117 | 5.500568  | -0.684232 | H | 18.514768 | 11.210432 | 0.823354  |
| C | -17.926116 | 5.662464  | -1.881253 | H | 22.625362 | 10.606485 | -0.302755 |
| C | -19.800435 | 2.587965  | -4.055338 | C | 24.191912 | 6.243109  | -0.680754 |
| H | -18.052927 | 1.480488  | -3.443043 | H | 23.832781 | 4.120528  | -0.533517 |
| C | -19.978790 | 4.900041  | -3.310412 | H | 24.279640 | 8.396950  | -0.736973 |
| C | -15.941146 | 6.830642  | -0.309290 | H | 20.729871 | 12.126517 | 0.206691  |
| H | -14.916862 | 4.933070  | -0.373918 | H | 25.231594 | 6.115847  | -0.966204 |
| C | -18.073792 | 6.992051  | -1.474615 | C | 22.902855 | -3.305209 | -5.857350 |
| C | -20.500613 | 3.811201  | -4.009062 | C | 23.372181 | -1.455775 | -4.631379 |
| H | -20.224599 | 1.766940  | -4.623657 | C | 22.312439 | -4.443773 | -6.412192 |
| H | -20.531689 | 5.833190  | -3.275710 | C | 24.119184 | -2.776828 | -6.361677 |
| C | -17.074643 | 7.575814  | -0.695256 | C | 23.364121 | -0.417460 | -3.695864 |
| H | -15.177855 | 7.316135  | 0.289473  | C | 24.418920 | -1.596011 | -5.578894 |
| H | -18.951363 | 7.569295  | -1.747008 | C | 22.966566 | -5.058831 | -7.477155 |
| N | -16.910782 | -3.656799 | 1.502364  | H | 21.375583 | -4.833401 | -6.029160 |
| N | -16.872907 | 3.627887  | -1.985296 | C | 24.755765 | -3.415836 | -7.432142 |

|   |            |            |           |   |            |            |           |
|---|------------|------------|-----------|---|------------|------------|-----------|
| C | 24.417074  | 0.493806   | -3.731127 | C | -22.016537 | 4.797350   | -5.753033 |
| H | 22.567234  | -0.326414  | -2.965813 | C | -22.901209 | 3.195079   | -4.414553 |
| C | 25.464957  | -0.665954  | -5.591429 | C | -21.169603 | 5.707188   | -6.391405 |
| C | 24.177316  | -4.555268  | -7.983291 | C | -23.361622 | 4.614960   | -6.166271 |
| H | 22.528409  | -5.945938  | -7.925203 | C | -23.120602 | 2.228345   | -3.429594 |
| H | 25.688049  | -3.024190  | -7.829078 | C | -23.926698 | 3.591720   | -5.311371 |
| C | 25.457283  | 0.376194   | -4.669060 | C | -21.693621 | 6.446916   | -7.448975 |
| H | 24.433087  | 1.311131   | -3.016006 | H | -20.139233 | 5.830980   | -6.076079 |
| H | 26.273749  | -0.758786  | -6.310725 | C | -23.862431 | 5.372993   | -7.231339 |
| H | 24.662610  | -5.060276  | -8.812810 | C | -24.385532 | 1.648930   | -3.362329 |
| H | 26.262293  | 1.104571   | -4.670165 | H | -22.334583 | 1.942598   | -2.738966 |
| C | 19.769035  | -8.838709  | 1.151856  | C | -25.188524 | 2.992318   | -5.221218 |
| C | 19.876949  | -9.495909  | -1.015896 | C | -23.026345 | 6.286680   | -7.866110 |
| C | 19.606262  | -8.117897  | 2.338055  | H | -21.056031 | 7.161539   | -7.961284 |
| C | 20.243097  | -10.176013 | 1.152150  | H | -24.890337 | 5.246703   | -7.559401 |
| C | 19.799572  | -9.573613  | -2.409074 | C | -25.410764 | 2.021962   | -4.248580 |
| C | 20.311737  | -10.595747 | -0.232008 | H | -24.582348 | 0.894934   | -2.605668 |
| C | 19.912648  | -8.762436  | 3.534336  | H | -25.984566 | 3.283861   | -5.900529 |
| H | 19.258180  | -7.090761  | 2.327391  | H | -23.404205 | 6.880868   | -8.692425 |
| C | 20.543474  | -10.799196 | 2.369095  | H | -26.385149 | 1.549787   | -4.169571 |
| C | 20.178513  | -10.770317 | -3.012858 | C | -21.939287 | -7.452006  | -0.016227 |
| H | 19.453789  | -8.732231  | -2.999647 | C | -22.825443 | -5.439128  | -0.569993 |
| C | 20.687588  | -11.786266 | -0.865274 | C | -21.097403 | -8.492740  | 0.385031  |
| C | 20.374167  | -10.089916 | 3.554498  | C | -23.261144 | -7.696711  | -0.469973 |
| H | 19.794719  | -8.223959  | 4.470186  | C | -23.054496 | -4.077234  | -0.784670 |
| H | 20.907288  | -11.822674 | 2.386600  | C | -23.826996 | -6.411556  | -0.823441 |
| C | 20.621201  | -11.866850 | -2.253014 | C | -21.603767 | -9.789585  | 0.339107  |
| H | 20.128799  | -10.855554 | -4.094496 | H | -20.083816 | -8.297881  | 0.718085  |
| H | 21.023989  | -12.637068 | -0.279485 | C | -23.744626 | -9.009960  | -0.504813 |
| H | 20.603375  | -10.563005 | 4.504399  | C | -24.303043 | -3.700038  | -1.273644 |
| H | 20.911706  | -12.784397 | -2.755366 | H | -22.288281 | -3.339075  | -0.574141 |
| C | -17.236608 | 9.386281   | 1.037632  | C | -25.072929 | -6.004202  | -1.314551 |
| C | -17.273505 | 10.042022  | -1.133149 | C | -22.914080 | -10.049790 | -0.097809 |
| C | -17.211763 | 8.651583   | 2.226304  | H | -20.969546 | -10.615858 | 0.646823  |
| C | -17.345655 | 10.800893  | 1.038618  | H | -24.754850 | -9.213992  | -0.848284 |
| C | -17.245773 | 10.092517  | -2.529392 | C | -25.303777 | -4.650392  | -1.539860 |
| C | -17.368983 | 11.219575  | -0.347397 | H | -24.505854 | -2.647708  | -1.450202 |
| C | -17.282595 | 9.357576   | 3.425016  | H | -25.850482 | -6.736173  | -1.514022 |
| H | -17.144619 | 7.569150   | 2.216010  | H | -23.278638 | -11.072185 | -0.119068 |
| C | -17.414955 | 11.484780  | 2.258045  | H | -26.265727 | -4.322692  | -1.921777 |
| C | -17.328869 | 11.344811  | -3.133712 | C | -17.402508 | -6.942798  | 7.068084  |
| H | -17.159997 | 9.188343   | -3.122086 | C | -17.474121 | -4.827948  | 7.883059  |
| C | -17.451886 | 12.465006  | -0.981149 | C | -17.302360 | -8.072929  | 6.252247  |
| C | -17.380324 | 10.759639  | 3.445404  | C | -17.554331 | -7.050572  | 8.474766  |
| H | -17.265093 | 8.809942   | 4.362816  | C | -17.504393 | -3.438803  | 8.032503  |
| H | -17.498446 | 12.567760  | 2.276023  | C | -17.599992 | -5.699986  | 8.995251  |
| C | -17.433752 | 12.521157  | -2.371536 | C | -17.369870 | -9.321908  | 6.865301  |
| H | -17.310945 | 11.410817  | -4.217675 | H | -17.174754 | -7.980586  | 5.179150  |
| H | -17.526494 | 13.375788  | -0.393702 | C | -17.620128 | -8.318613  | 9.064196  |
| H | -17.432994 | 11.279150  | 4.397242  | C | -17.649360 | -2.929632  | 9.320938  |
| H | -17.499368 | 13.481133  | -2.874311 | H | -17.423161 | -2.780120  | 7.174659  |

|   |            |            |           |   |           |           |           |
|---|------------|------------|-----------|---|-----------|-----------|-----------|
| C | -17.743847 | -5.160723  | 10.279060 | C | -3.472851 | -1.677527 | -1.572066 |
| C | -17.529914 | -9.448039  | 8.256076  | C | -2.526538 | -1.030917 | -2.392090 |
| H | -17.296218 | -10.216013 | 6.253078  | C | -1.171015 | -1.206350 | -2.157634 |
| H | -17.737667 | -8.418740  | 10.139532 | C | -0.722664 | -2.027102 | -1.101380 |
| C | -17.765312 | -3.778016  | 10.435671 | C | -1.649240 | -2.674917 | -0.281429 |
| H | -17.676208 | -1.853312  | 9.464107  | H | -3.731004 | -3.021710 | 0.094389  |
| H | -17.841373 | -5.814299  | 11.141311 | H | -2.865458 | -0.373812 | -3.188147 |
| H | -17.581599 | -10.436603 | 8.701862  | H | -1.322495 | -3.318820 | 0.530168  |
| H | -17.876309 | -3.348408  | 11.426518 | C | 0.015326  | -0.611353 | -2.890283 |
| N | 15.725048  | 5.600122   | 6.970374  | H | 0.024740  | -0.890582 | -3.952150 |
| N | 20.237505  | 6.912390   | 0.408717  | C | 1.197355  | -1.192567 | -2.139834 |
| N | 22.456804  | -2.497641  | -4.806353 | C | 2.554202  | -1.002303 | -2.354515 |
| N | 19.549258  | -8.433640  | -0.167874 | C | 3.494955  | -1.635307 | -1.517829 |
| N | -17.193161 | 8.933663   | -0.284359 | C | 3.025447  | -2.455588 | -0.472976 |
| N | -21.745753 | 3.931546   | -4.689409 | C | 1.664103  | -2.651221 | -0.252741 |
| N | -21.682872 | -6.078819  | -0.080382 | C | 0.742763  | -2.017509 | -1.089474 |
| N | -17.354132 | -5.590284  | 6.717718  | H | 2.898242  | -0.344277 | -3.147685 |
| H | 0.008911   | 0.486172   | -2.858158 | H | 1.332450  | -3.296924 | 0.555429  |
| C | -3.009205  | -2.496296  | -0.523239 | H | 3.744440  | -2.968993 | 0.157963  |

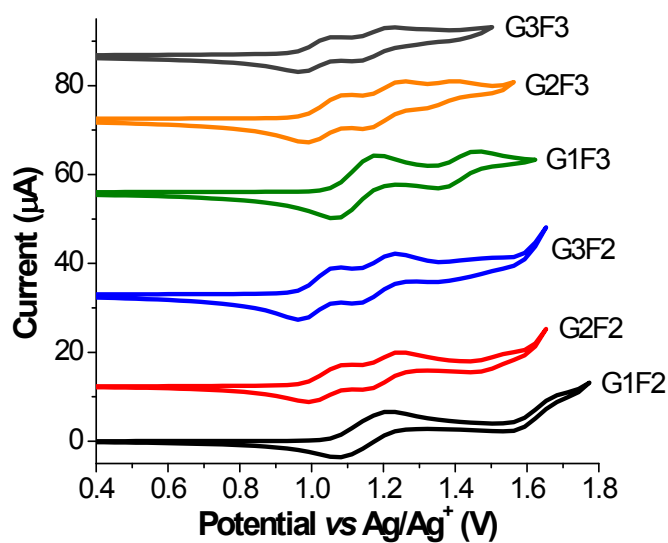

**Figure SI\_4** CV curves of **G<sub>n</sub>F<sub>m</sub>** measured in CH<sub>2</sub>Cl<sub>2</sub>/n-Bu<sub>4</sub>NPF<sub>6</sub> at a scan rate of 50 mV s<sup>-1</sup>.



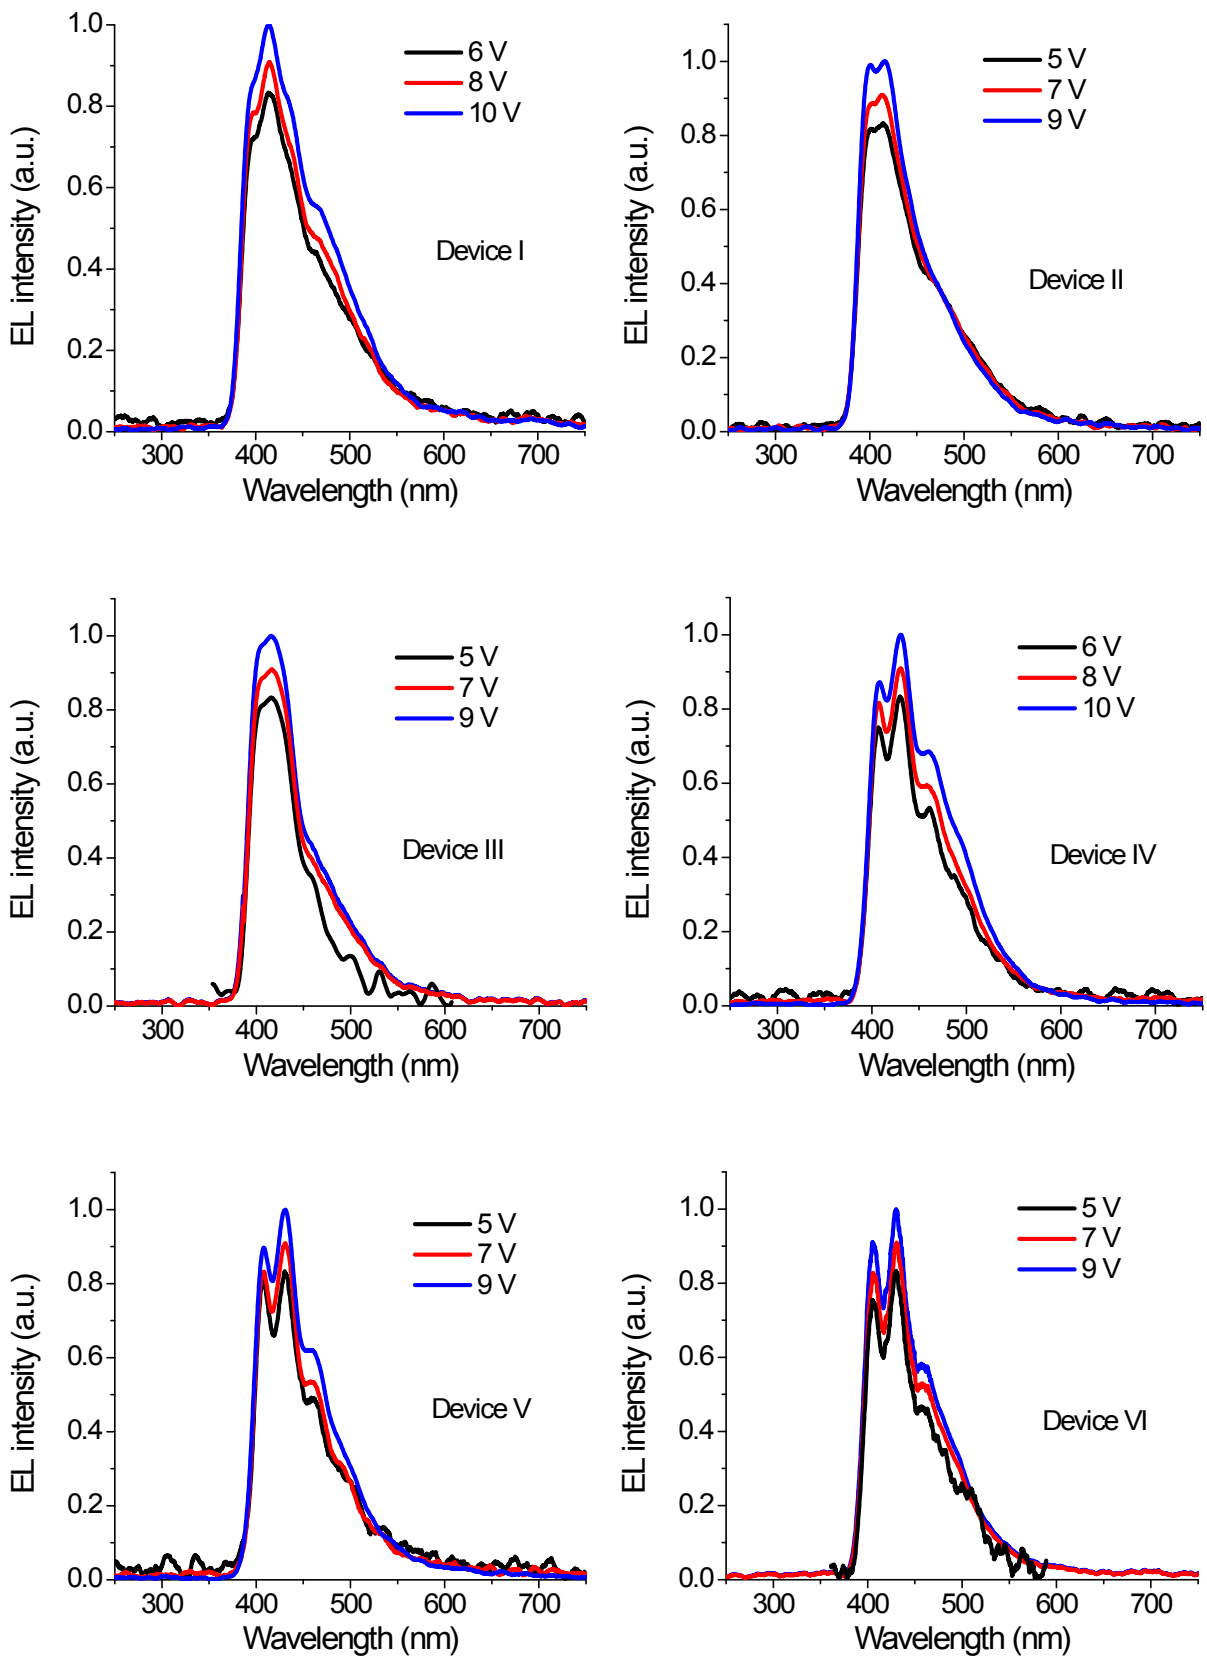

**Figure SI\_5.** Plots of EL spectra at different applied voltages of the blue OLEDs (device I-VI).

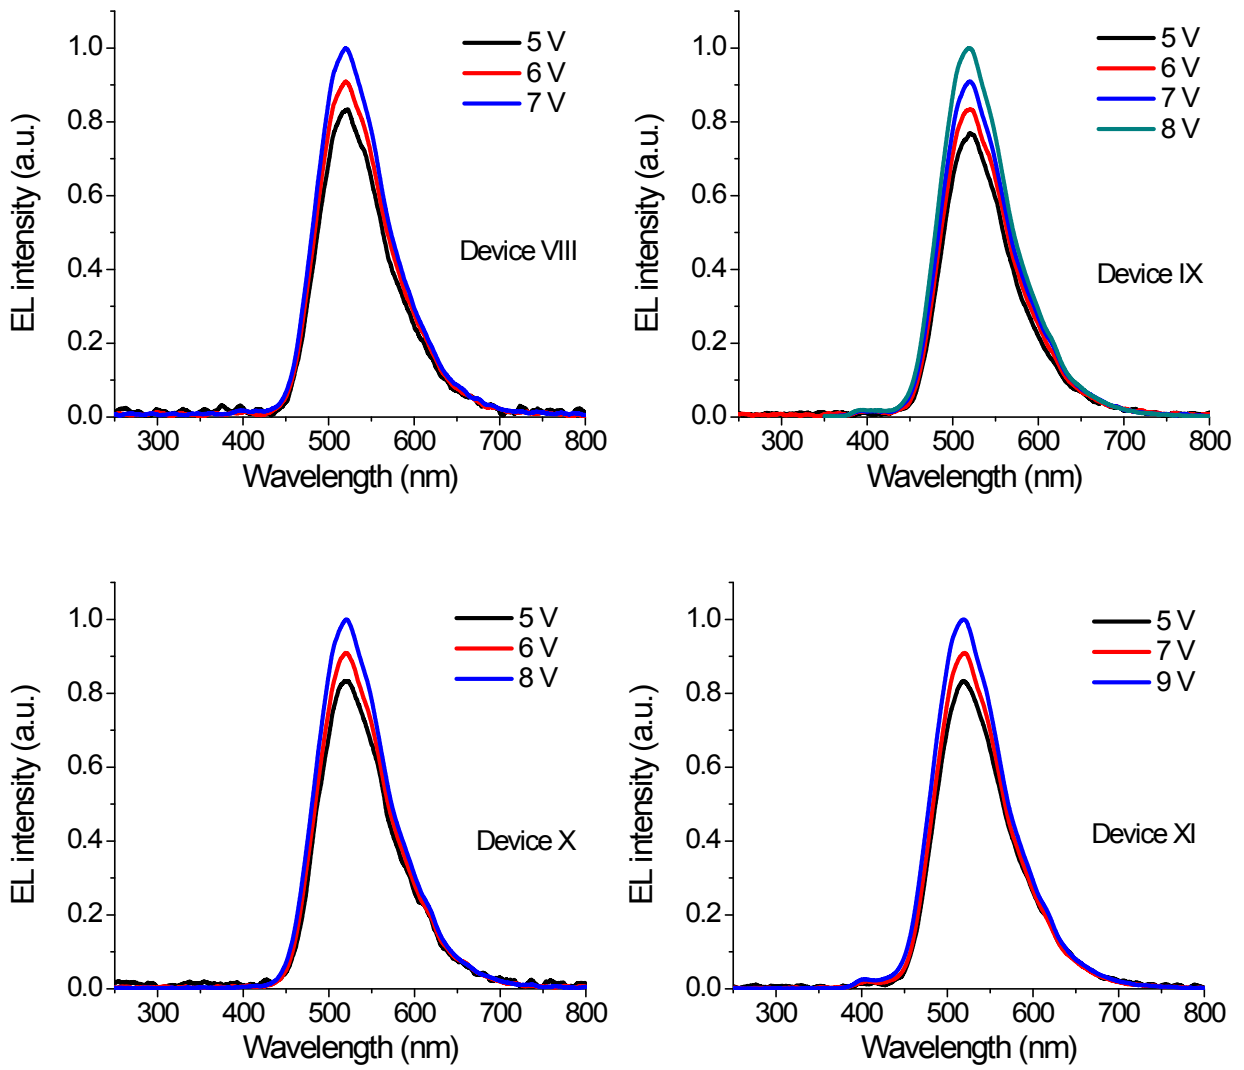

**Figure SI\_6.** Plots of EL spectra at different applied voltages of the blue OLEDs (device I-VI).

Figure SI\_6. <sup>1</sup>H-NMR and <sup>13</sup>C NMR spectra  
Compound 3

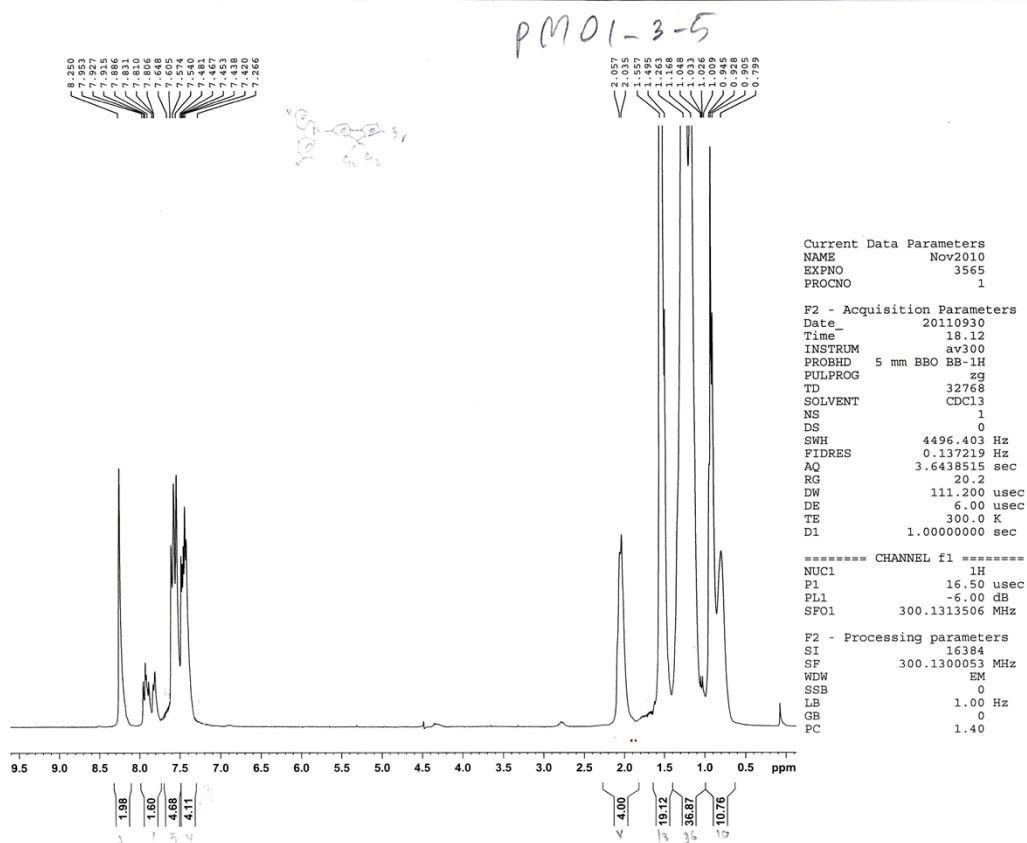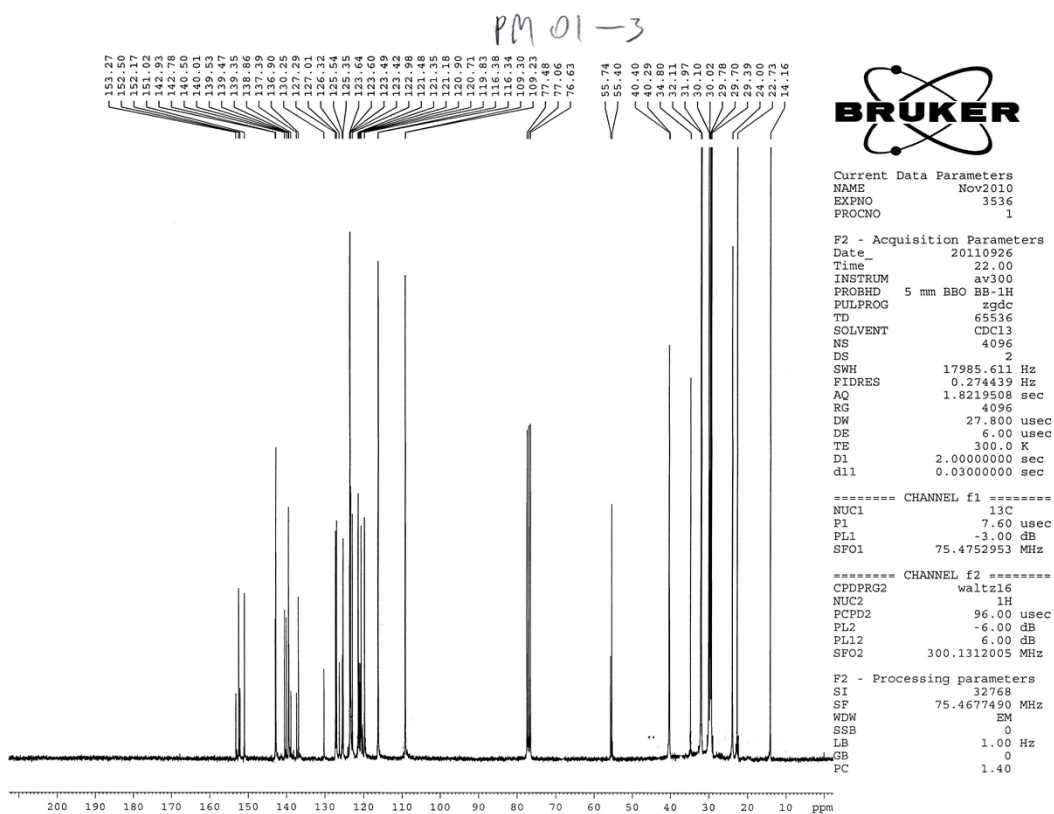

# Compound 4

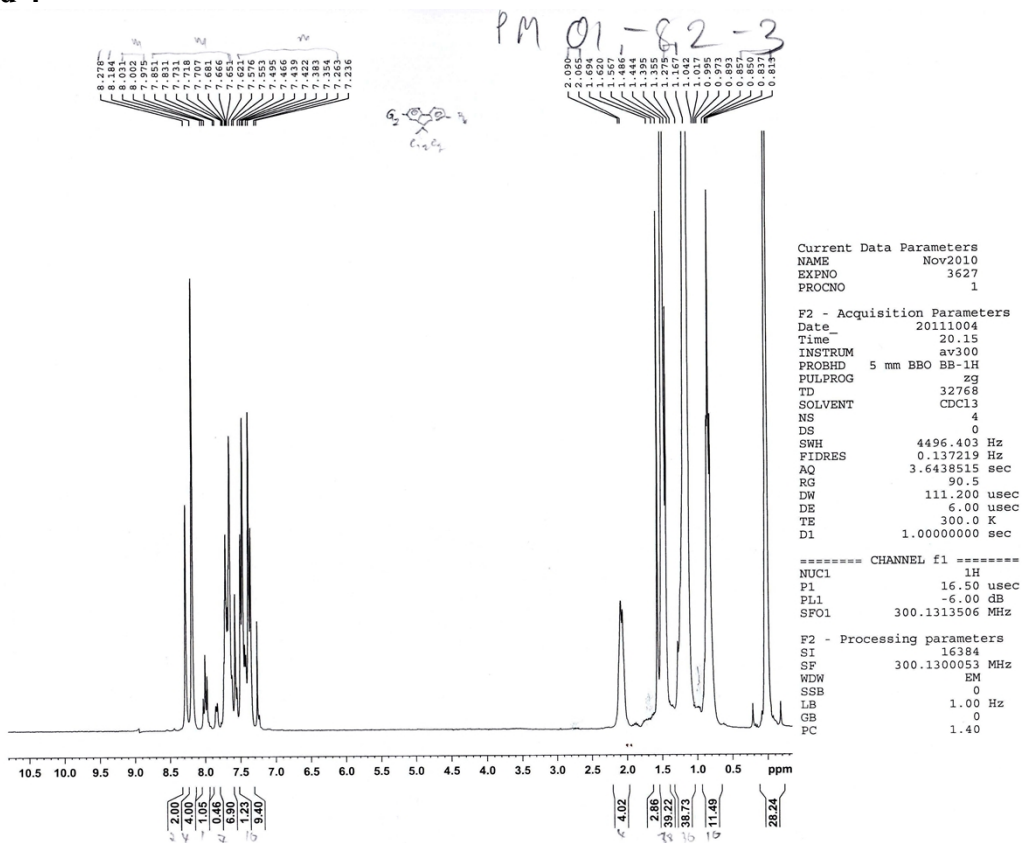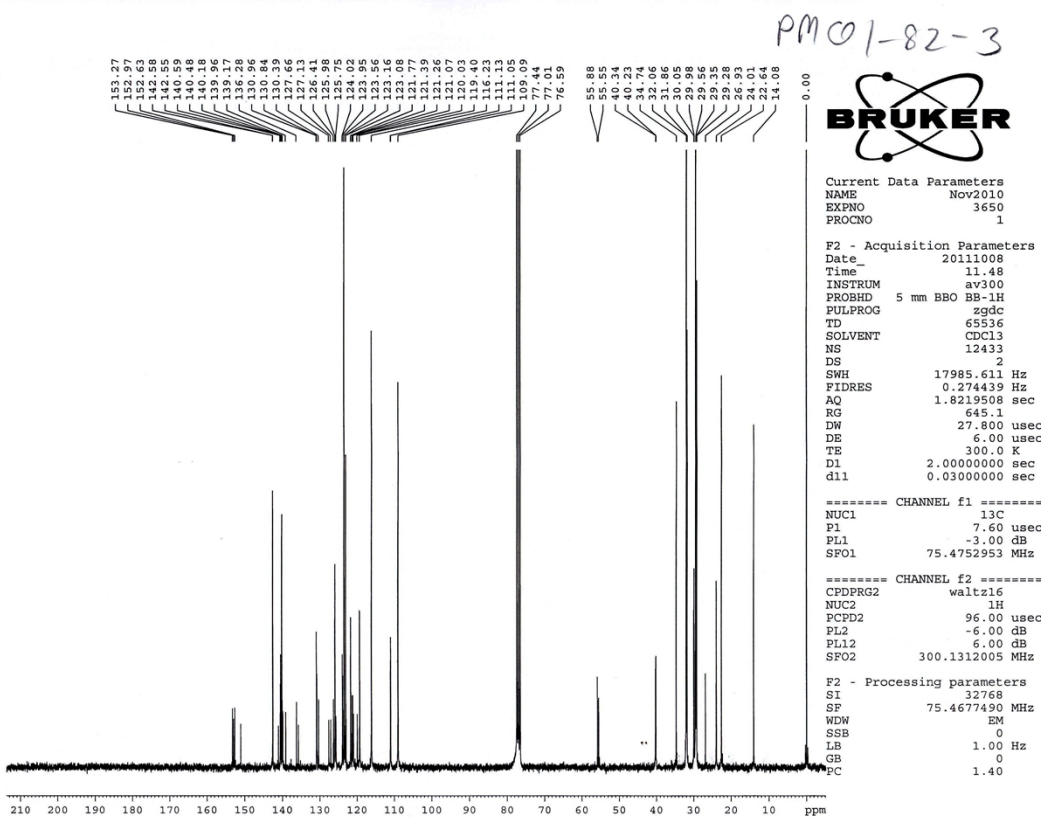

Compound 5

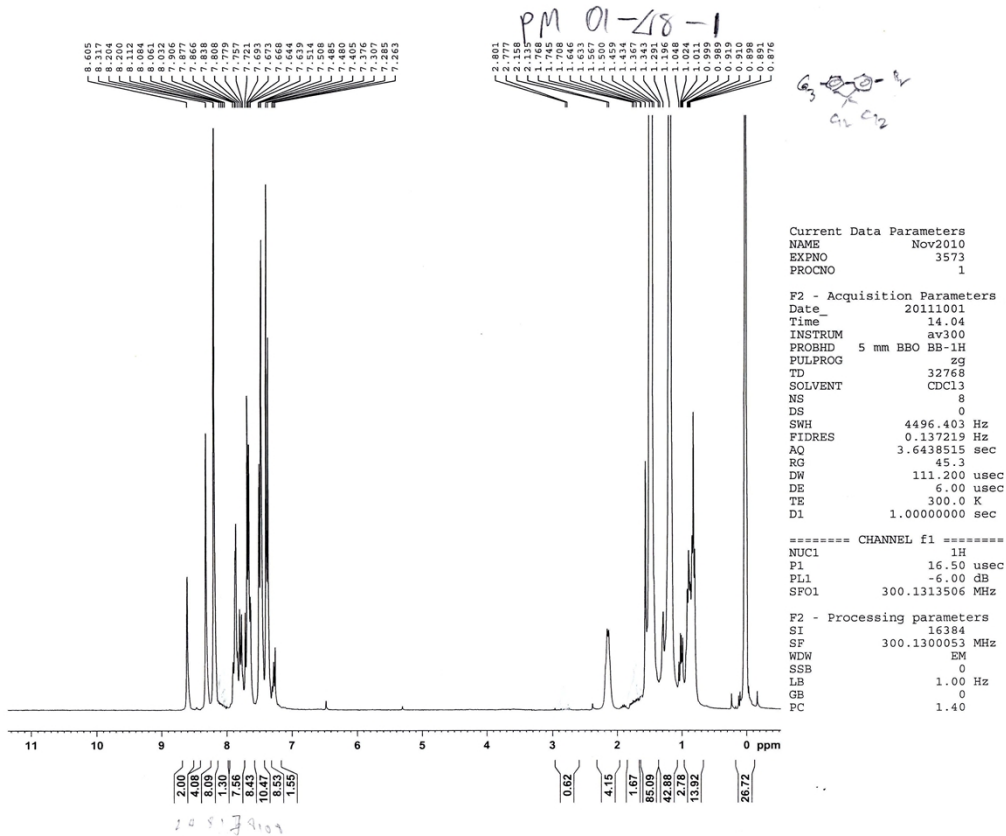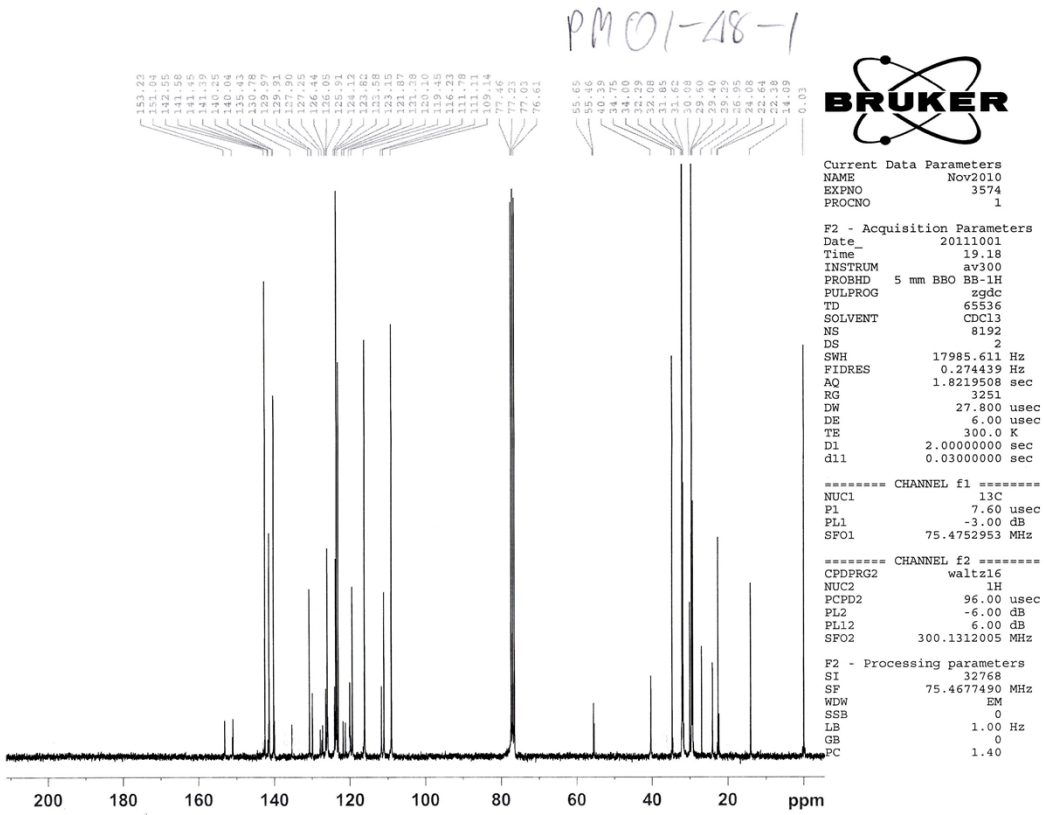

Compound G1F2

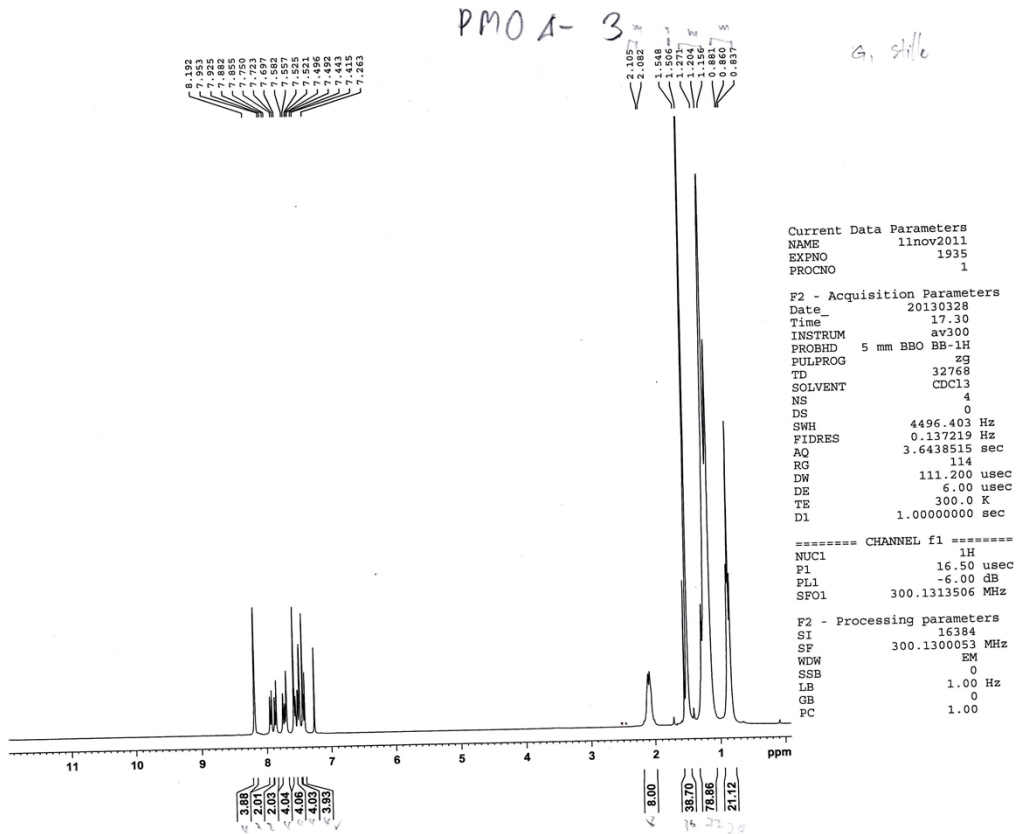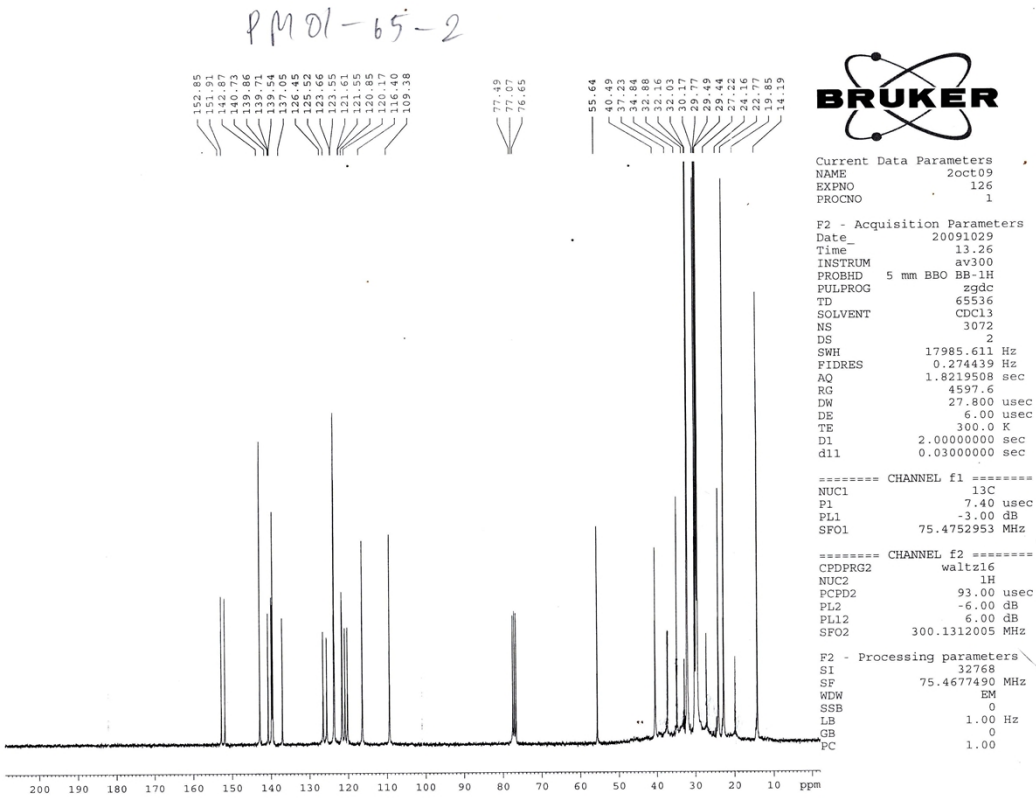

Compound G2F2

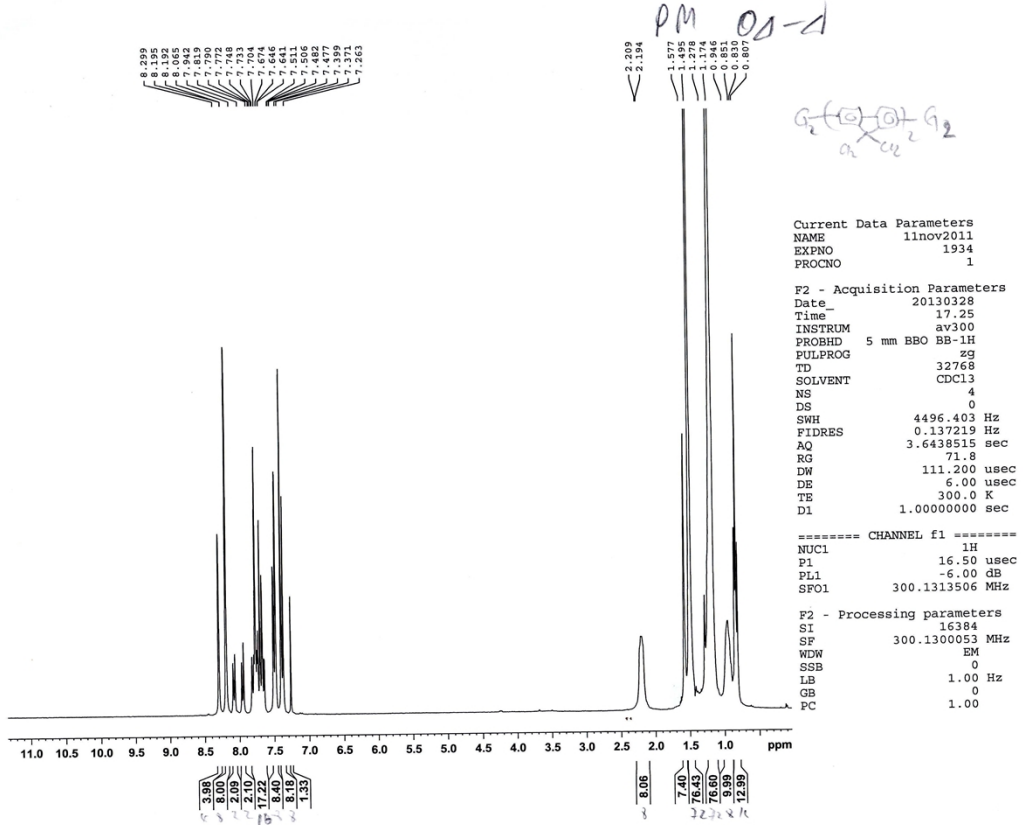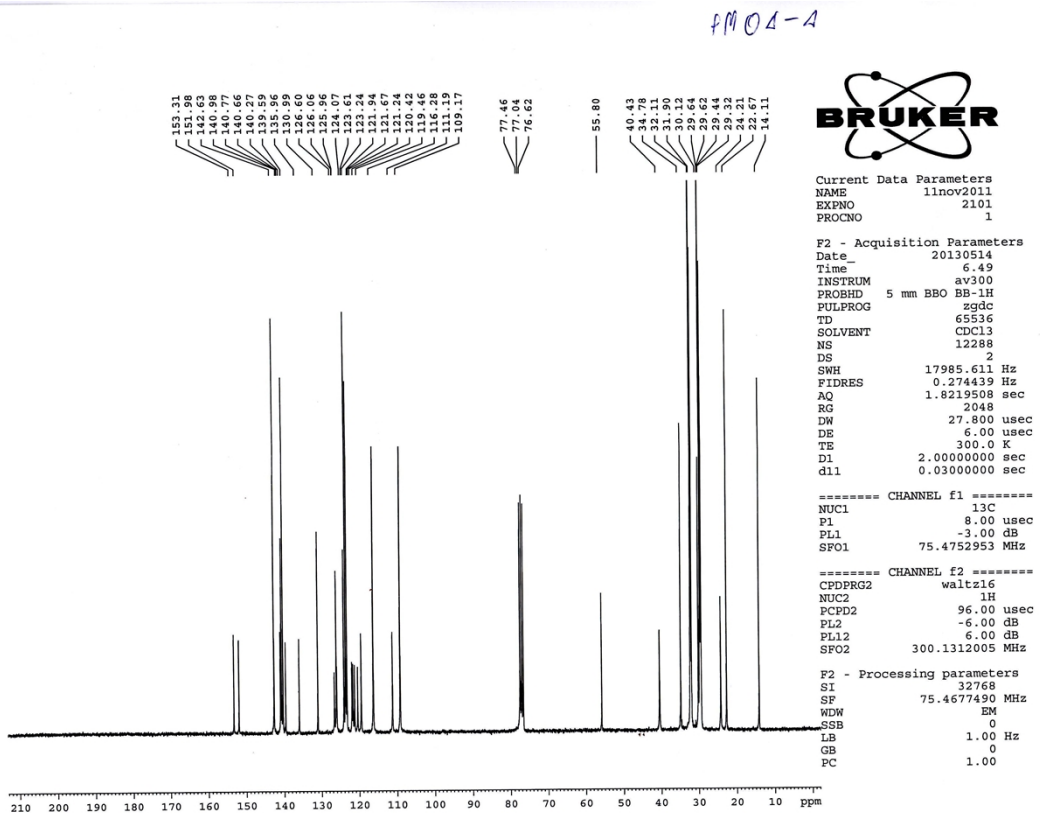

Compound G3F2

PM01-69

013 ✓

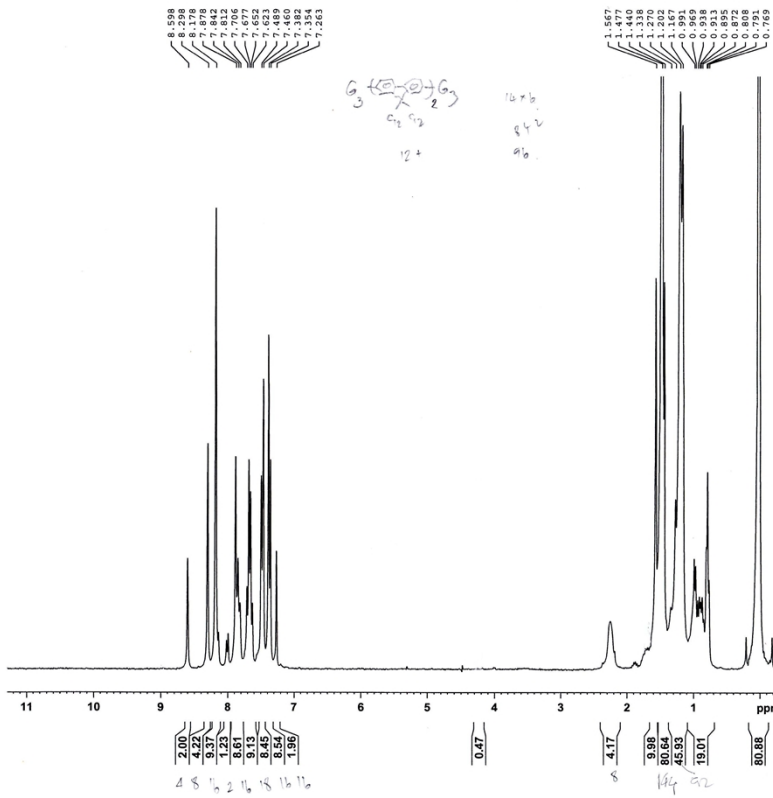

Current Data Parameters  
 NAME Nov2010  
 EXPNO 1025  
 PROCNO 1

F2 - Acquisition Parameters  
 Date\_ 20110314  
 Time 16.12  
 INSTRUM av300  
 PROBHD 5 mm BBO BB-1H  
 PULPROG zg  
 TD 32768  
 SOLVENT CDCl3  
 NS 1  
 DS 0  
 SWH 4496.403 Hz  
 FIDRES 0.137219 Hz  
 AQ 3.6438515 sec  
 RG 114  
 DW 111.200 usec  
 DE 6.00 usec  
 TE 300.0 K  
 D1 1.00000000 sec

===== CHANNEL f1 =====  
 NUC1 1H  
 P1 16.50 usec  
 PL1 -6.00 dB  
 SFO1 300.1313506 MHz

F2 - Processing parameters  
 SI 16384  
 SF 300.1300053 MHz  
 WDW EM  
 SSB 0  
 LB 1.00 Hz  
 GB 0  
 PC 1.00

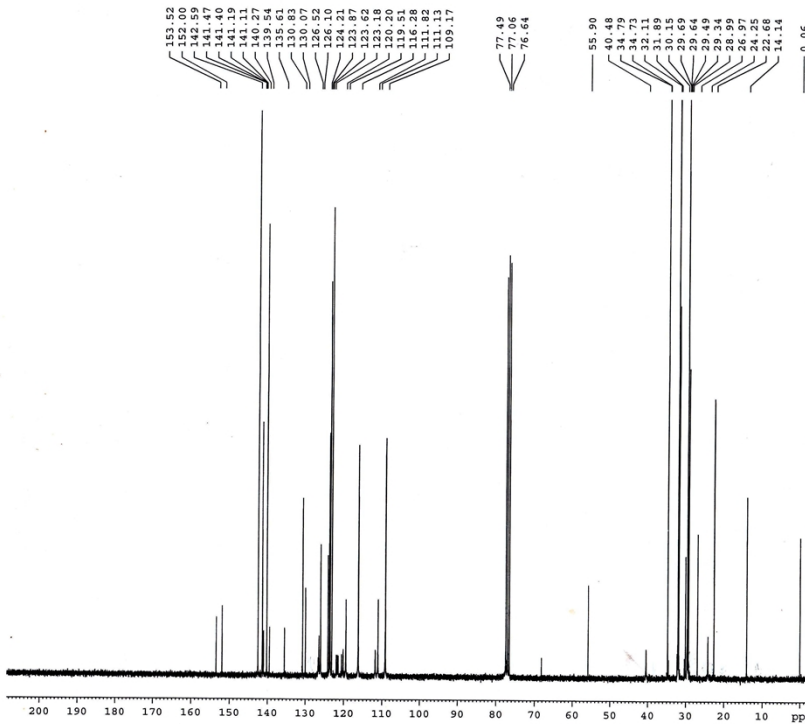

**BRUKER**

Current Data Parameters  
 NAME Nov2010  
 EXPNO 1046  
 PROCNO 1

F2 - Acquisition Parameters  
 Date\_ 20110319  
 Time 9.44  
 INSTRUM av300  
 PROBHD 5 mm BBO BB-1H  
 PULPROG zgdc  
 TD 65536  
 SOLVENT CDCl3  
 NS 15360  
 DS 2  
 SWH 17985.611 Hz  
 FIDRES 0.274439 Hz  
 AQ 1.8219508 sec  
 RG 4597.6  
 DW 27.800 usec  
 DE 6.00 usec  
 TE 300.0 K  
 D1 2.00000000 sec  
 d11 0.03000000 sec

===== CHANNEL f1 =====  
 NUC1 13C  
 P1 7.60 usec  
 PL1 -3.00 dB  
 SFO1 75.4752953 MHz

===== CHANNEL f2 =====  
 CPDPRG2 waltz16  
 NUC2 1H  
 FCPD2 96.00 usec  
 PL2 -6.00 dB  
 PL12 6.00 dB  
 SFO2 300.1312005 MHz

F2 - Processing parameters  
 SI 32768  
 SF 75.4677490 MHz  
 WDW no  
 SSB 0  
 LB 0.00 Hz  
 GB 0  
 PC 1.40



Compound G1F3

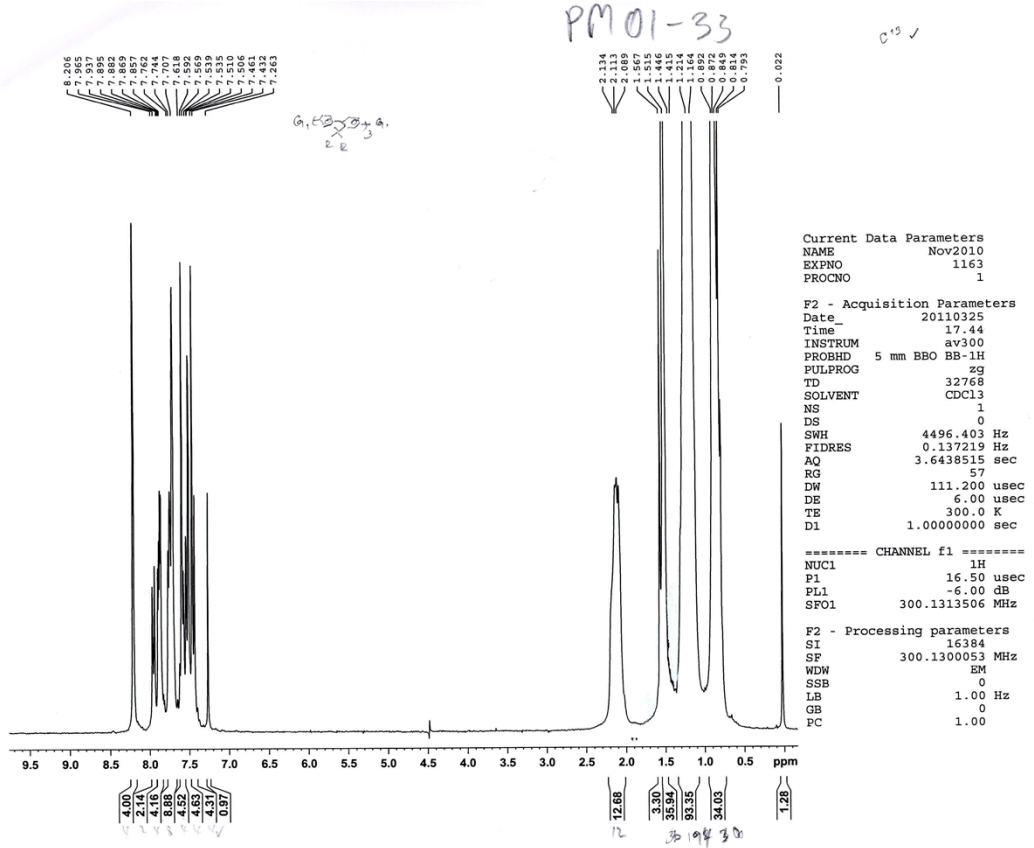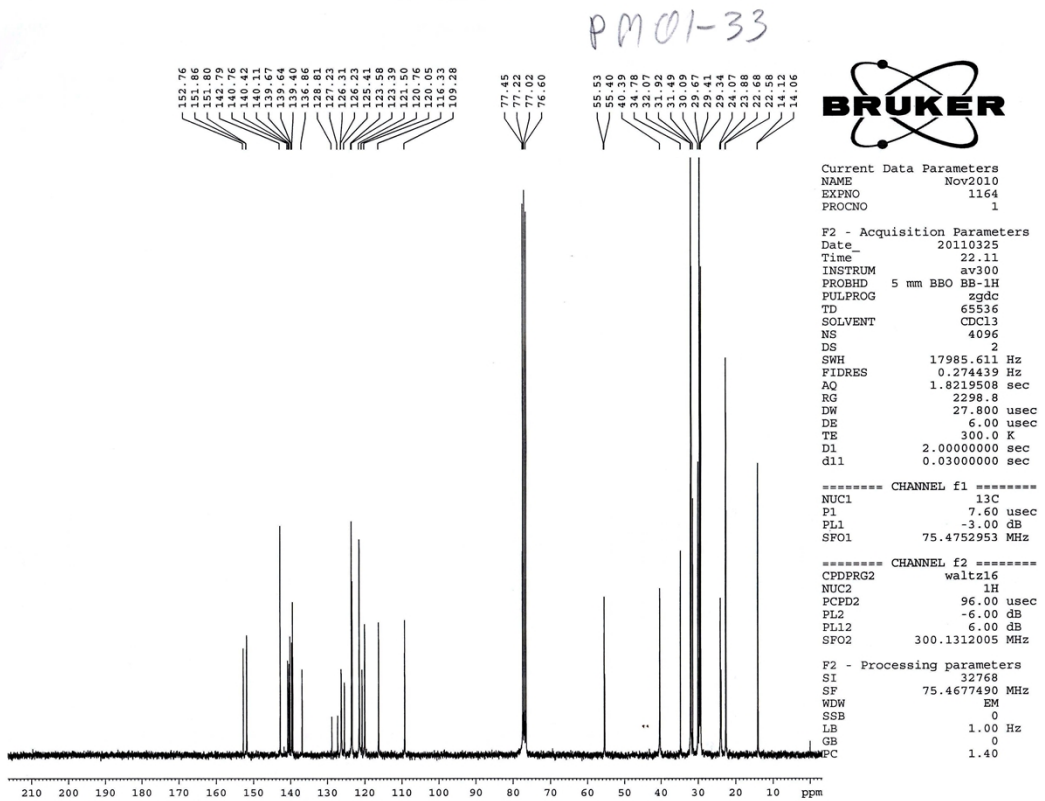

Compound G2F3

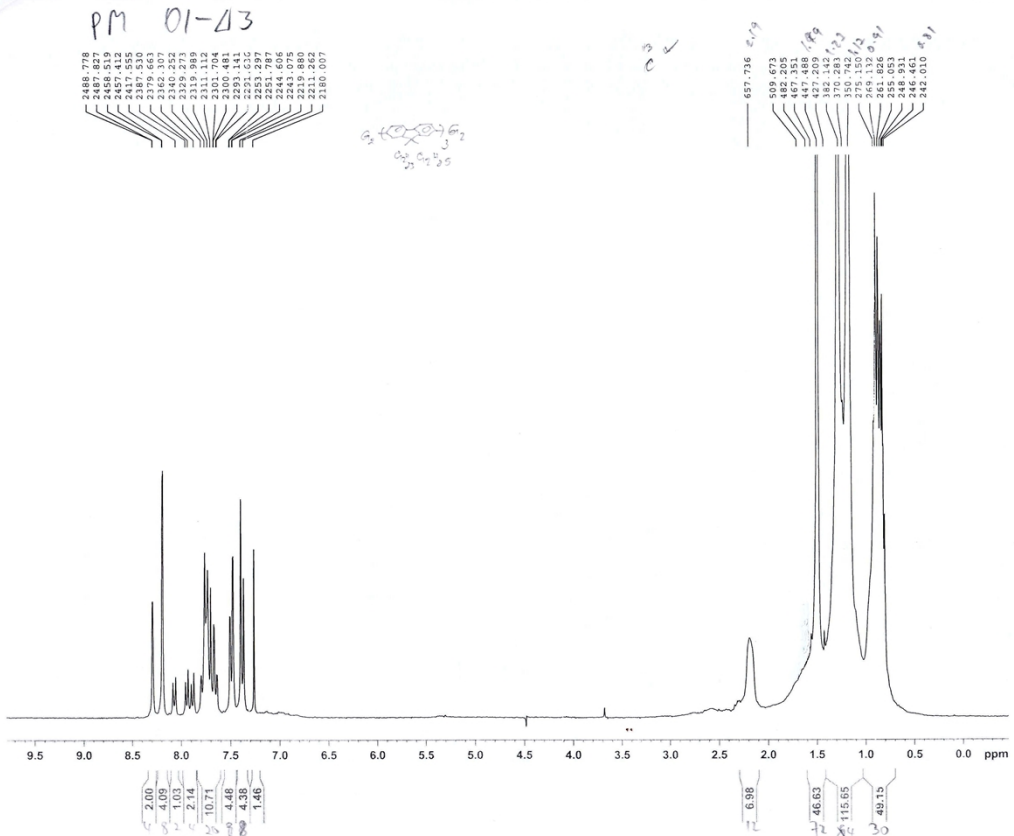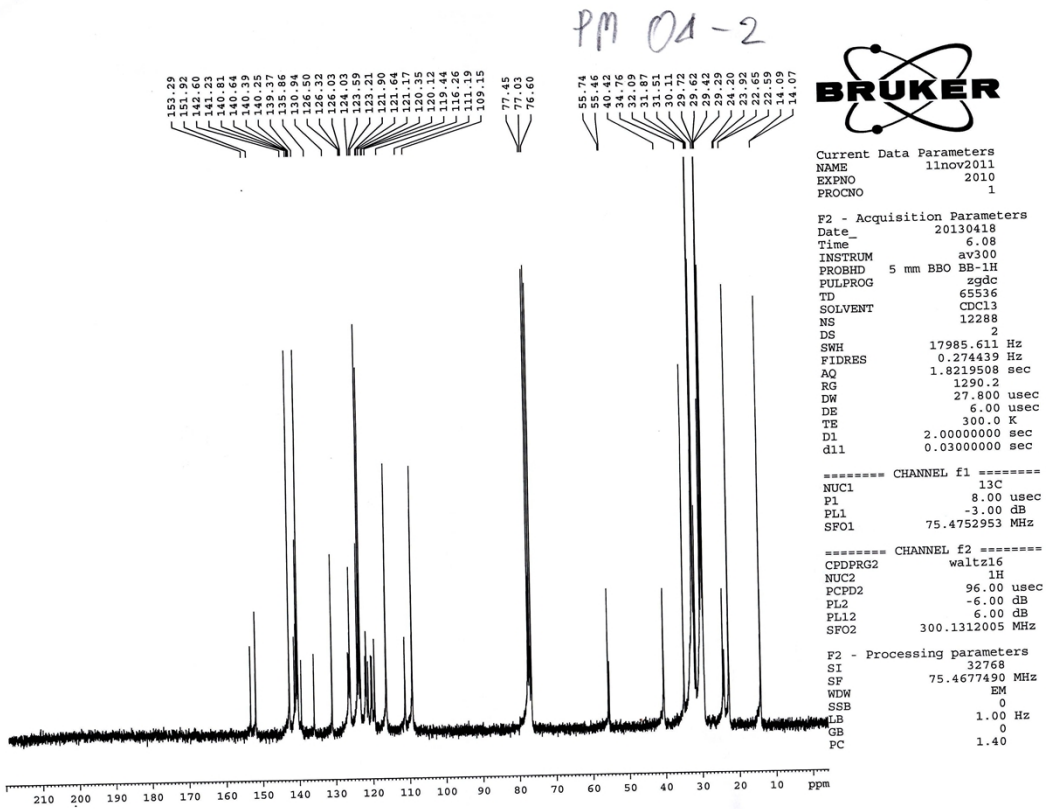

Compound G3F3

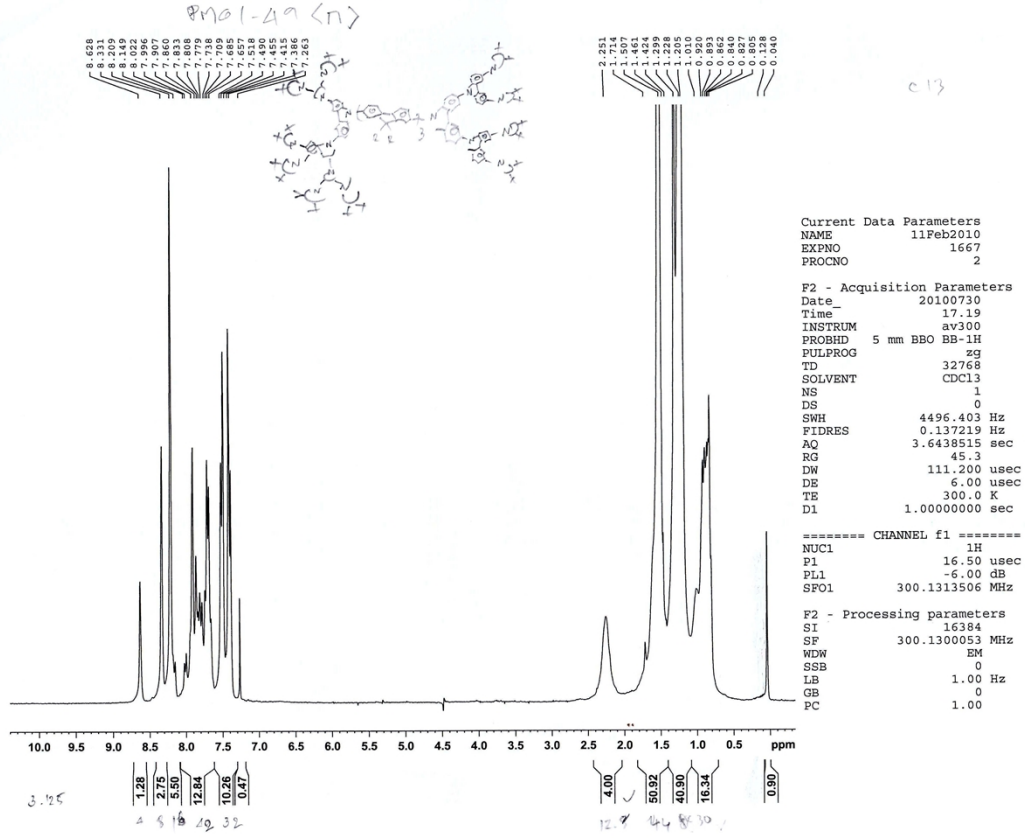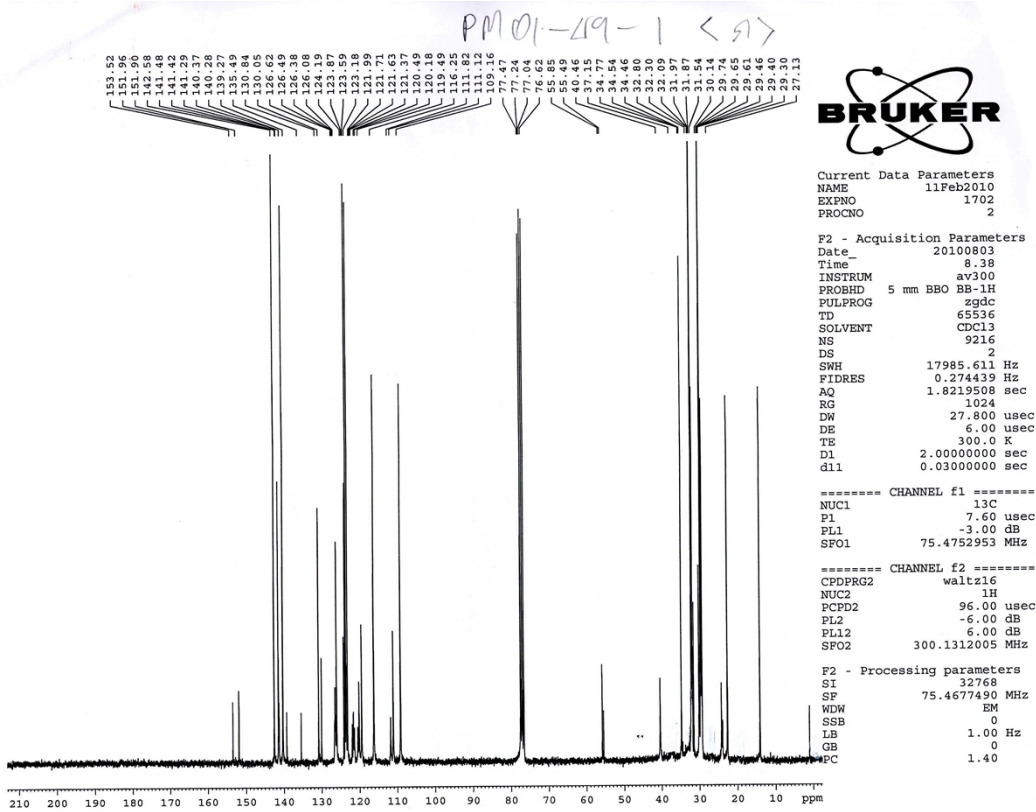

Supplement: c4tc00637b1.pdf [file c4tc00637b1.pdf]
